# Supplementary material for: One-pot sequential synthesis of isocyanates and urea derivatives via a microwave-assisted Staudinger–aza-Wittig reaction
Source: PubMed Central journal article supplement (PMC3869261; doi:10.3762/bjoc.9.274), 2013-11-06
Supplement: Beilstein_J_Org_Chem-09-2378-s001.pdf [file Beilstein_J_Org_Chem-09-2378-s001.pdf]

## Supporting Information

for

### **One-pot sequential synthesis of isocyanates and urea compounds via a microwave-assisted Staudinger–aza-Wittig reaction**

Diego Carnaroglio<sup>1</sup>, Katia Martina<sup>1</sup>, Giovanni Palmisano<sup>2</sup>, Andrea Penoni<sup>2</sup>, Claudia Domini<sup>3</sup> and Giancarlo Cravotto\*<sup>1</sup>

Address: <sup>1</sup> Dipartimento di Scienza e Tecnologia del Farmaco, University of Turin, Via Pietro Giuria 9, 10125 Torino, Italy; Fax +390116707687; Tel: +390116707684;

<sup>2</sup>Dipartimento di Scienza e Alta Tecnologia, University of Insubria, Via Valleggio 11, 22100 Como, Italy and <sup>3</sup> Department of Chemistry, Universidad Nacional del Sur, Av. Alem 1253, B8000CPB, Bahía Blanca, Buenos Aires, Argentina

Email: Giancarlo Cravotto\* - [giancarlo.cravotto@unito.it](mailto:giancarlo.cravotto@unito.it)

\* Corresponding author

**Detailed analytical data of the prepared compounds and a collection of NMR spectra**

## Table of contents

|                                                       |    |
|-------------------------------------------------------|----|
| 1. Analytical Data.....                               | S3 |
| 2. $^1\text{H}$ and $^{13}\text{C}$ NMR spectra ..... | S8 |

## 1. Analytical Data

### *N*-benzyl-*N'*-(1-phenylethyl)urea 10 (Table 3, entry 1) [1]:

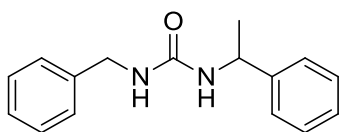

Yield 79 mg (98%); a white solid.  $^1\text{H}$  NMR (300 MHz,  $\text{CDCl}_3$ )  $\delta$  7.37 – 7.13 (m, 10H), 4.76 (q,  $J=6.00$  Hz, 1H), 4.33 (s, 2H), 1.46 (d,  $J=6$  Hz, 3H) ppm.  $^{13}\text{C}$  NMR (75 MHz,  $\text{CDCl}_3$ )  $\delta$  158.13, 144.16, 139.07, 129.09, 128.91, 127.68, 127.60, 127.53, 126.16, 50.83, 44.69, 23.71 ppm.  $m/z$  (MALDI-TOF MS): calcd for  $\text{C}_{16}\text{H}_{18}\text{N}_2\text{O}$   $[\text{M} + \text{H}]^+$ : 255.1419, found: 255.1416.

### *N*-Octyl-*N'*-(1-phenylethyl)urea 11 (Table 3, entry 2):

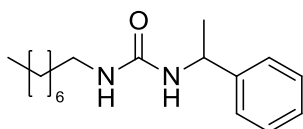

Yield 79 mg (90%); a yellowish oil.  $^1\text{H}$  NMR (300 MHz,  $\text{CDCl}_3$ )  $\delta$  7.36 – 7.26 (m, 5H), 4.71 (q,  $J=6$  Hz, 1H), 3.11 (t,  $J=6$  Hz, 2H), 1.48 (m, 2H), 1.32 – 1.09 (o.s., 10H), 0.87 (o.s., 6H) ppm.  $^{13}\text{C}$  NMR (75 MHz,  $\text{CDCl}_3$ )  $\delta$  159.35, 137.62, 129.26, 128.25, 127.75, 45.25, 41.53, 32.09, 29.84, 29.49, 29.48, 27.00, 22.97, 14.44 ppm.  $m/z$  (MALDI-TOF MS): calcd for  $\text{C}_{17}\text{H}_{28}\text{N}_2\text{O}$   $[\text{M} + \text{H}]^+$ : 277.2201, found: 277.2198.

### *N,N'*-bis(1-phenylethyl)urea 12 (Table 3, entry 3) [2]:

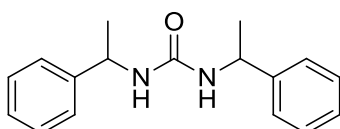

Yield 78 mg (92%); a white solid.  $^1\text{H}$  NMR (300 MHz,  $\text{CDCl}_3$ )  $\delta$  7.36 – 7.09 (m, 10H), 4.73 (q,  $J=6$  Hz, 2H), 1.34 (d,  $J=6$  Hz, 6H) ppm.  $^{13}\text{C}$  NMR (300 MHz,  $\text{CDCl}_3$ )  $\delta$  157.57, 144.13, 129.02, 127.57, 126.05, 50.74, 23.69 ppm.  $m/z$  (MALDI-TOF MS): calcd for  $\text{C}_{17}\text{H}_{20}\text{N}_2\text{O}$   $[\text{M} + \text{H}]^+$ : 269.1576, found: 269.1569.

### *N*-(3-methoxybenzyl)-*N'*-(1-phenylethyl)urea 13 (Table 3, entry 4):

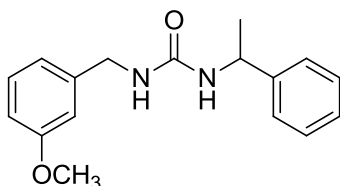

Yield 87 mg (97%); a white solid.  $^1\text{H}$  NMR (75 MHz,  $\text{CD}_3\text{OD}$ )  $\delta$  7.34 – 7.13 (m, 5H), 6.87 – 6.72 (m, 4H), 4.84 (q,  $J=6$  Hz, 1H), 4.27 (s, 2H), 3.74 (s, 3H), 1.42 (d,  $J=9$  Hz, 3H) ppm.  $^{13}\text{C}$  NMR (75

MHz, CD<sub>3</sub>OD)  $\delta$  161.33, 160.30, 146.43, 142.89, 130.45, 129.47, 127.85, 126.81, 120.30, 113.52, 113.46, 64.30, 55.56, 44.56, 23.57 ppm.  $m/z$  (MALDI-TOF MS): calcd for C<sub>17</sub>H<sub>20</sub>N<sub>2</sub>O<sub>2</sub> [M + H]<sup>+</sup>: 285.1524, found: 285.1527.

***N*-(3-(benzyloxy)propyl)-*N'*-(1-phenylethyl)urea 14 (Table 3, entry 5):**

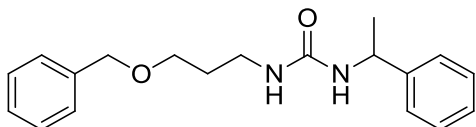

Yield 96 mg (97%); a yellowish oil. <sup>1</sup>H NMR (300 MHz, CDCl<sub>3</sub>)  $\delta$  7.35 – 7.15 (m, 10H), 4.50 (q, 1H), 4.38 (s, 2H), 3.48 (t, 2H), 3.26 (t, 2H), 1.72 (m, 2H), 1.38 (d,  $J=6$  Hz, 3H) ppm. <sup>13</sup>C NMR (75 MHz, CDCl<sub>3</sub>)  $\delta$  158.93, 143.28, 138.14, 128.98, 128.73, 128.09, 127.72, 126.02, 73.31, 63.97, 51.33, 39.04, 29.51, 23.46 ppm.  $m/z$  (MALDI-TOF MS): calcd for C<sub>19</sub>H<sub>24</sub>N<sub>2</sub>O<sub>2</sub> [M + H]<sup>+</sup>: 313.1838, found: 313.1836.

***N*-(2,6-dimethylphenyl)-2-(3-(1-phenylethyl)ureido)acetamide 15 (Table 3, entry 6):**

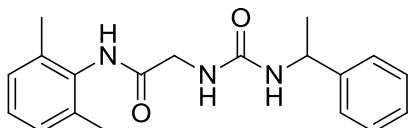

Yield 100 mg (98%); a white solid. <sup>1</sup>H NMR (300 MHz, CD<sub>3</sub>OD)  $\delta$  7.47 – 7.07 (m, 8H), 4.45 (q,  $J=6$  Hz, 1H), 4.24 (s, 2H), 2.16 (s, 6H), 1.63 (d,  $J=6$  Hz, 3H) ppm. <sup>13</sup>C NMR (75 MHz, CDCl<sub>3</sub>)  $\delta$  170.60, 157.85, 137.95, 136.83, 129.98, 129.30, 128.08, 127.28, 126.21, 52.12, 47.09, 20.68, 18.17 ppm.  $m/z$  (MALDI-TOF MS): calcd for C<sub>19</sub>H<sub>23</sub>N<sub>3</sub>O<sub>2</sub> [M + H]<sup>+</sup>: 326.1790, found: 326.1793.

***N*-(3-chlorobenzyl)-*N'*-(1-phenylethyl)urea 16 (Table 3, entry 7):**

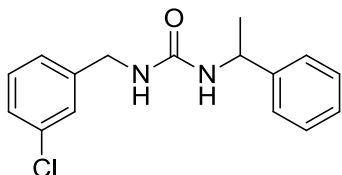

Yield 86 mg (94%); a white solid. <sup>1</sup>H NMR (300 MHz, CDCl<sub>3</sub>)  $\delta$  7.32 – 6.97 (m, 9H), 4.76 (q,  $J=6$  Hz, 1H), 3.76 (s, 2H), 1.41 (d,  $J=6$  Hz, 3H) ppm. <sup>13</sup>C NMR (75 MHz, CDCl<sub>3</sub>)  $\delta$  158.97, 140.16, 134.72, 134.70, 130.20, 129.13, 127.88, 127.26, 125.94, 125.38, 64.00, 43.98, 23.59 ppm.  $m/z$  (MALDI-TOF MS): calcd for C<sub>16</sub>H<sub>17</sub>ClN<sub>2</sub>O [M + H]<sup>+</sup>: 289.1029, found: 289.1033.

***N,N'*-bis-benzylurea 27 (Table 4, entry 1) [1]:**

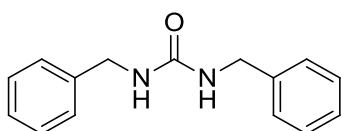

Yield 74 mg (98%); a white solid.  $^1\text{H}$  NMR (300 MHz,  $\text{CDCl}_3$ )  $\delta$  7.36 – 7.23 (m, 10H), 4.38 (s, 3H) ppm.  $^{13}\text{C}$  NMR (75 MHz,  $\text{CDCl}_3$ )  $\delta$  158.78, 139.06, 128.95, 127.67, 127.65, 44.82 ppm.  $m/z$  (MALDI-TOF MS): calcd for  $\text{C}_{15}\text{H}_{16}\text{N}_2\text{O}$   $[\text{M} + \text{H}]^+$ : 241.1262, found: 241.1259.

***N*-benzylmorpholine-4-carboxamide 28 (Table 4, entry 2) [3]:**

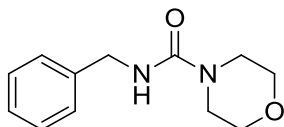

Yield 68 mg (98%); a yellowish solid.  $^1\text{H}$  NMR (300 MHz,  $\text{CDCl}_3$ )  $\delta$  7.28 – 7.20 (m, 5H), 4.38 (s, 2H), 3.63 (t,  $J=6$  Hz, 4H), 3.30 (t,  $J=6$  Hz, 4H) ppm.  $^{13}\text{C}$  NMR (75 MHz,  $\text{CDCl}_3$ )  $\delta$  157.75, 139.27, 129.04, 120.16, 127.83, 66.68, 45.38, 44.60 ppm.  $m/z$  (MALDI-TOF MS): calcd for  $\text{C}_{12}\text{H}_{16}\text{N}_2\text{O}_2$   $[\text{M} + \text{H}]^+$ : 221.1212, found: 221.1219.

***N*-benzyl-*N'*-phenylurea 29 (Table 4, entry 3) [4]:**

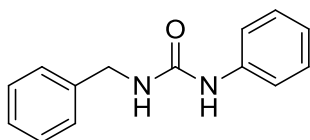

Yield 69 mg (98%); a yellowish solid.  $^1\text{H}$  NMR (300 MHz,  $\text{CDCl}_3$ )  $\delta$  7.35 – 7.13 (m, 10H), 4.44 (s, 2H) ppm.  $^{13}\text{C}$  NMR (75 MHz,  $\text{CDCl}_3$ )  $\delta$  156.72, 129.72, 129.20, 129.04, 127.81, 127.76, 127.62, 124.74, 121.97, 44.64 ppm.  $m/z$  (MALDI-TOF MS): calcd for  $\text{C}_{14}\text{H}_{14}\text{N}_2\text{O}$   $[\text{M} + \text{H}]^+$ : 227.1106, found: 227.1100.

***N*-(1-phenylethyl)morpholine-4-carboxamide 30 (Table 4, entry 5) [3]:**

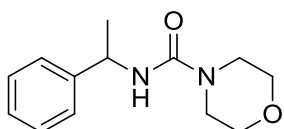

Yield 69 mg (94%); a yellowish solid.  $^1\text{H}$  NMR (300 MHz,  $\text{CDCl}_3$ )  $\delta$  7.30 – 7.17 (m, 5H), 4.95 (q,  $J=6$  Hz, 1H), 3.62 (t,  $J=6$  Hz, 4H), 3.27 (t,  $J=6$  Hz, 4H), 1.43 (d,  $J=6$  Hz, 3H) ppm.  $^{13}\text{C}$  NMR (75 MHz,  $\text{CDCl}_3$ )  $\delta$  157.14, 144.36, 144.36, 128.99, 127.59, 126.45, 66.71, 50.51, 44.45, 22.84 ppm.  $m/z$  (MALDI-TOF MS): calcd for  $\text{C}_{13}\text{H}_{18}\text{N}_2\text{O}_2$   $[\text{M} + \text{H}]^+$ : 235.1368, found: 235.1372.

***N*-(1-phenylethyl)-*N'*-phenylurea 31 (Table 4, entry 6):**

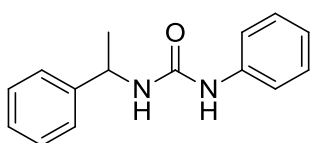

Yield 75 mg (98%); a yellowish solid.  $^1\text{H}$  NMR (300 MHz,  $\text{CDCl}_3$ )  $\delta$  7.37 – 7.06 (m, 10H), 4.95 (q,  $J=6$  Hz, 1H), 1.48 (d,  $J=6$  Hz, 3H) ppm.  $^{13}\text{C}$  NMR (75 MHz,  $\text{CDCl}_3$ )  $\delta$  155.86, 144.06, 138.61,

129.51, 129.06, 127.66, 126.23, 124.07, 121.12, 50.41, 23.28 ppm.  $m/z$  (MALDI-TOF MS): calcd for  $C_{15}H_{16}N_2O$   $[M + H]^+$ : 241.1262, found: 241.1256.

***N*-(1-phenylethyl)-3,4-dihydroisoquinoline-2-carboxamide 32 (Table 4, entry 7):**

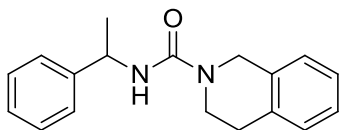

Yield 87 mg (98%); a white solid.  $^1H$  NMR (300 MHz,  $CDCl_3$ )  $\delta$  7.28 – 6.99 (m, 9H), 4.99 (q,  $J=6$  Hz, 1H), 4.44 (s, 2H), 3.52 (t,  $J=6$  Hz, 2H), 2.76 (t,  $J=6$  Hz, 2H), 1.43 (d,  $J=6$  Hz, 3H) ppm.  $^{13}C$  NMR (75 MHz,  $CDCl_3$ )  $\delta$  157.03, 144.71, 135.35, 133.59, 128.86, 128.64, 127.38, 126.92, 126.64, 126.60, 126.44, 50.38, 45.77, 41.46, 29.31, 22.92 ppm.  $m/z$  (MALDI-TOF MS): calcd for  $C_{18}H_{20}N_2O$   $[M + H]^+$ : 281.1575, found: 281.1578.

***N*-(1-phenylethyl)-*N'*-(2-chlorobenzyl)urea 33 (Table 4, entry 8):**

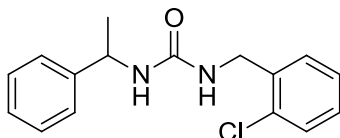

Yield 89 mg (98%); a yellowish solid.  $^1H$  NMR (300 MHz,  $CDCl_3$ )  $\delta$  7.27 – 7.11 (m, 9H), 4.73 (q,  $J=6$  Hz, 1H), 4.30 (s, 2H), 1.37 (d,  $J=6$  Hz, 3H) ppm.  $^{13}C$  NMR (75 MHz,  $CDCl_3$ )  $\delta$  158.20, 129.59, 129.48, 129.02, 128.76, 127.58, 127.26, 126.12, 50.76, 42.36, 23.70 ppm.  $m/z$  (MALDI-TOF MS): calcd for  $C_{16}H_{17}ClN_2O$   $[M + H]^+$ : 289.1029, found: 289.1031.

***N*-Octyl-*N'*-benzylurea 34 (Table 4, entry 9):**

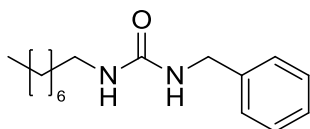

Yield 74 mg (89%); a yellowish oil.  $^1H$  NMR (300 MHz,  $CDCl_3$ )  $\delta$  7.34 – 7.26 (m, 5H), 4.38 (s, 2H), 3.15 (t,  $J=6$  Hz, 2H), 1.47 (m, 2H), 1.25 (o.s., 10H), 0.82 (t,  $J=6$  Hz, 3H) ppm.  $^{13}C$  NMR (75 MHz,  $CDCl_3$ )  $\delta$  158.92, 139.46, 128.92, 127.66, 127.59, 44.77, 40.99, 32.13, 30.44, 29.56, 27.19, 22.98, 14.43 ppm.  $m/z$  (MALDI-TOF MS): calcd for  $C_{16}H_{26}N_2O$   $[M + H]^+$ : 263.2045, found: 263.2041.

***N*-Octyl-morpholine-4-carboxamide 35 (Table 4, entry 10):**

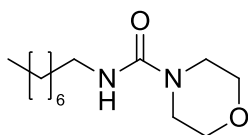

Yield 68 mg (89%); a yellowish oil.  $^1H$  NMR (300 MHz,  $CDCl_3$ )  $\delta$  3.70 (t,  $J=6$  Hz, 4H), 3.33 (t,  $J=6$  Hz, 4H), 3.22 (t,  $J=6$  Hz, 2H), 1.50 (m, 2H), 1.35 – 1.17 (o.s., 10H), 0.87 (t,  $J=6$  Hz, 3H) ppm.

$^{13}\text{C}$  NMR (75 MHz,  $\text{CDCl}_3$ )  $\delta$  158.20, 66.78, 44.27, 41.28, 32.09, 30.49, 29.52, 27.25, 22.93, 14.40 ppm.  $m/z$  (MALDI-TOF MS): calcd for  $\text{C}_{13}\text{H}_{26}\text{N}_2\text{O}_2$   $[\text{M} + \text{H}]^+$ : 243.1994, found: 243.1996.

***N*-Octyl-*N'*-phenylurea 36 (Table 4, entry 11) [5]:**

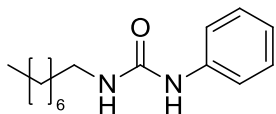

Yield 69 mg (88%); a yellowish oil.  $^1\text{H}$  NMR (300 MHz,  $\text{CDCl}_3$ )  $\delta$  7.34 – 7.09 (m, 5H), 3.23 (t,  $J=6$  Hz, 2H), 1.49 (m, 2H), 1.26 (o.s., 10H), 0.87 (t,  $J=6$  Hz, 3H) ppm.  $^{13}\text{C}$  NMR (75 MHz,  $\text{CDCl}_3$ )  $\delta$  156.84, 138.91, 129.50, 123.97, 121.28, 40.77, 32.14, 30.41, 29.57, 27.24, 22.98, 14.44 ppm.  $m/z$  (MALDI-TOF MS): calcd for  $\text{C}_{15}\text{H}_{24}\text{N}_2\text{O}$   $[\text{M} + \text{H}]^+$ : 249.1888, found: 249.1893.

***N*-(*sec*-butyl)-*N'*-(1-phenylethyl)urea 37 (Table 4, entry 12):**

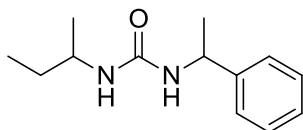

Yield 59 mg (85%); a yellowish solid.  $^1\text{H}$  NMR (300 MHz,  $\text{CD}_3\text{OD}$ )  $\delta$  7.32 – 7.21 (m, 5H), 4.84 (q,  $J=6$  Hz, 1H), 3.61 (m,  $J=6$  Hz, 1H), 1.43 (m, 5H), 1.09 (d,  $J=6$  Hz, 3H), 0.87 (t,  $J=6$  Hz, 3H) ppm.  $^{13}\text{C}$  NMR (75 MHz,  $\text{CDCl}_3$ )  $\delta$  158.72, 143.87, 128.98, 127.56, 126.02, 51.31, 48.90, 29.97, 20.92, 20.84, 10.58 ppm.  $m/z$  (MALDI-TOF MS): calcd for  $\text{C}_{13}\text{H}_{20}\text{N}_2\text{O}$   $[\text{M} + \text{H}]^+$ : 221.1575, found: 221.1577.

***N*-allyl-*N'*-(1-phenylethyl)urea 38 (Table 4, entry 13):**

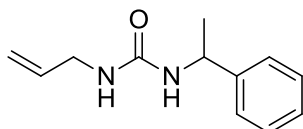

Yield 54 mg (83%); a yellowish solid.  $^1\text{H}$  NMR (300 MHz,  $\text{CDCl}_3$ )  $\delta$  7.31 – 7.20 (m, 5H), 5.70 (m, 1H), 5.00 (m, 2H), 4.73 (q,  $J=6$  Hz, 1H), 4.08 (d,  $J=9$  Hz, 2H), 1.38 (d,  $J=6$  Hz, 3H) ppm.  $^{13}\text{C}$  NMR (75 MHz,  $\text{CDCl}_3$ )  $\delta$  158.30, 144.44, 135.47, 120.02, 127.57, 126.17, 115.75, 50.58, 43.10, 23.70 ppm.  $m/z$  (MALDI-TOF MS): calcd for  $\text{C}_{12}\text{H}_{16}\text{N}_2\text{O}$   $[\text{M} + \text{H}]^+$ : 205.1262, found: 205.1266.

## 2. $^1\text{H}$ and $^{13}\text{C}$ NMR spectra

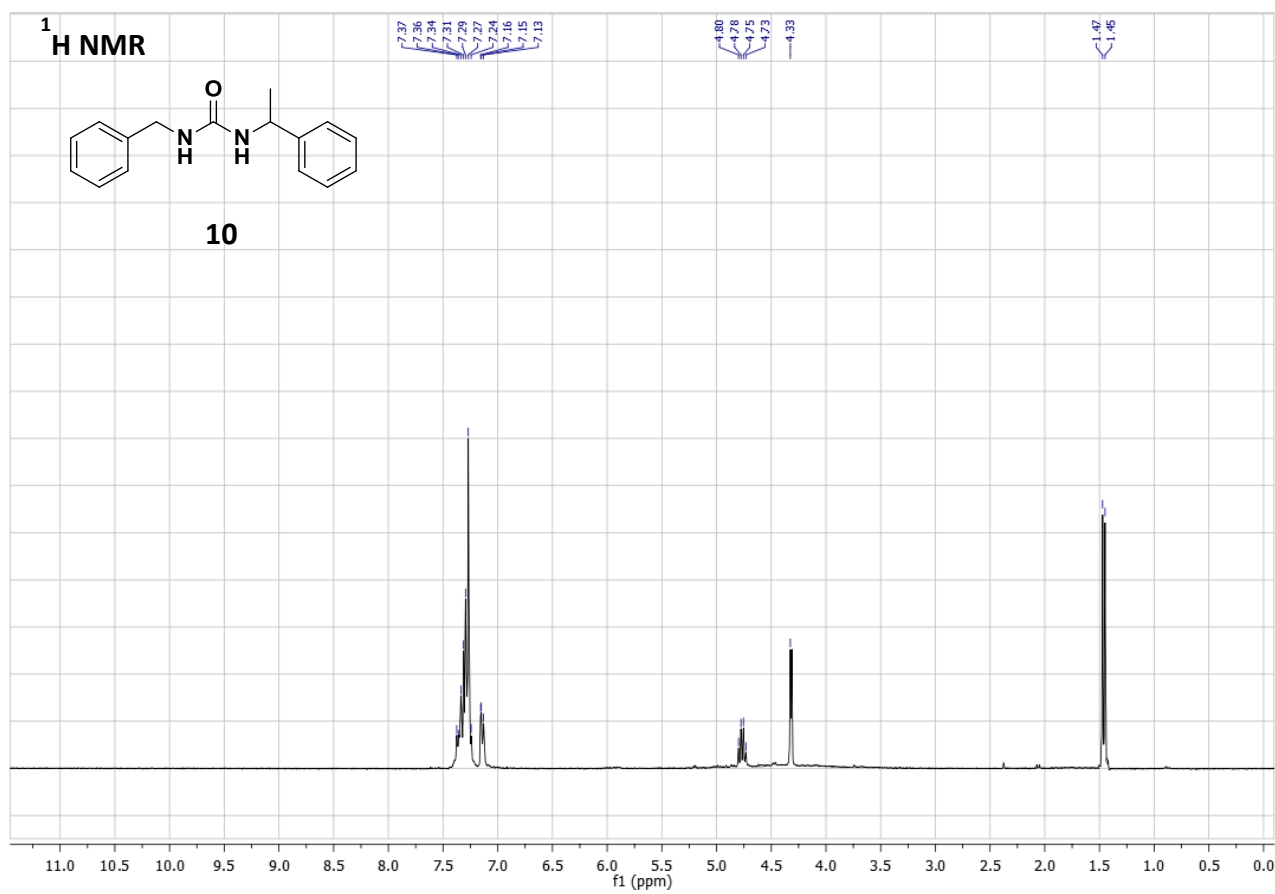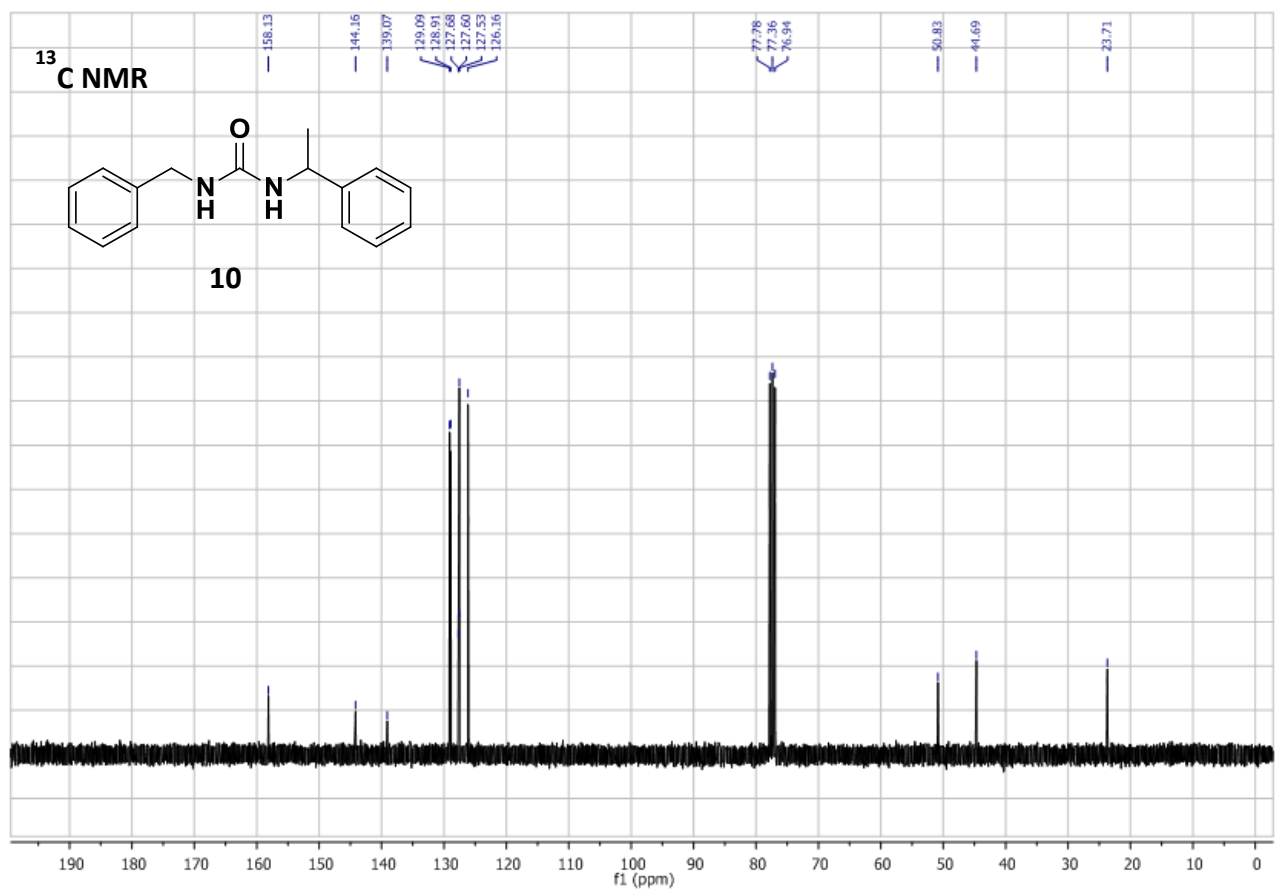



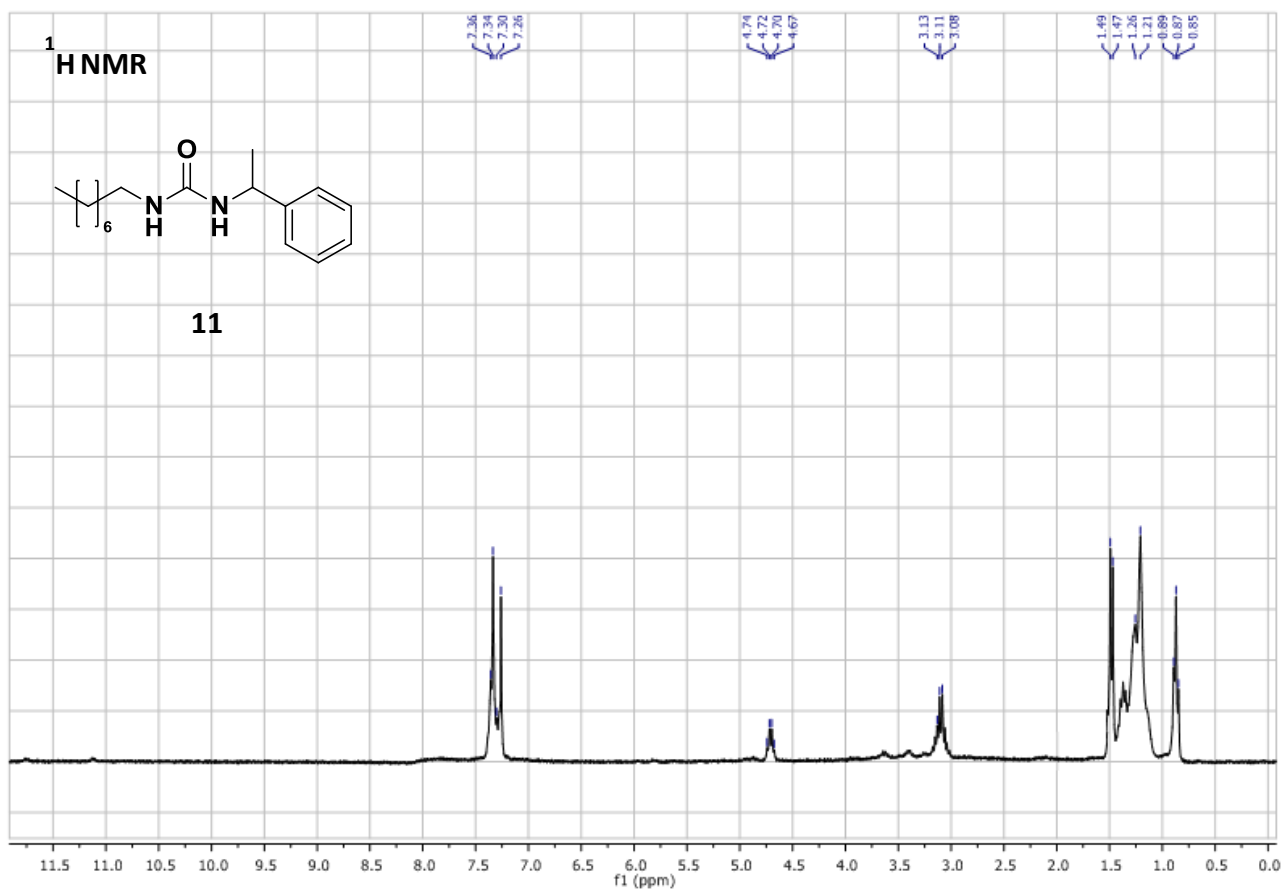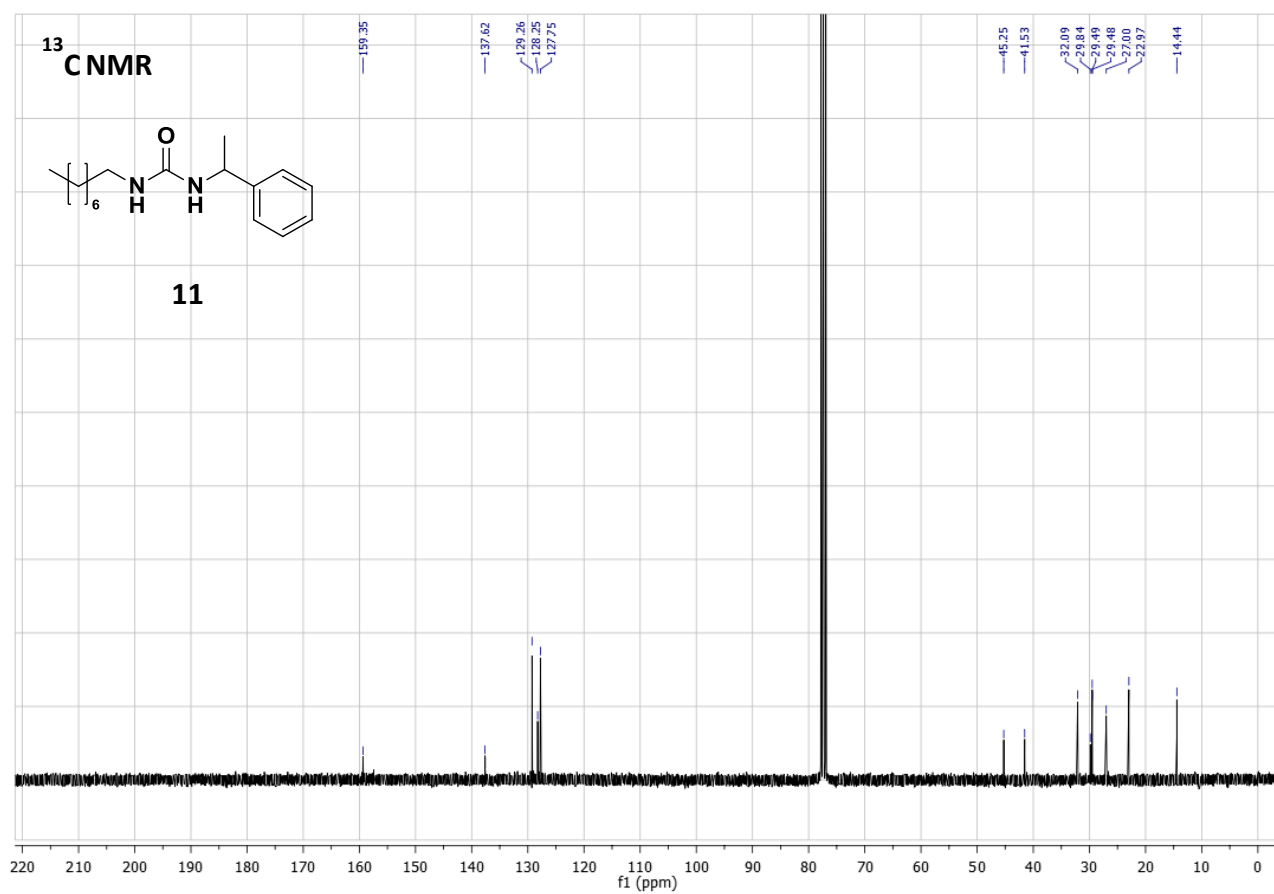

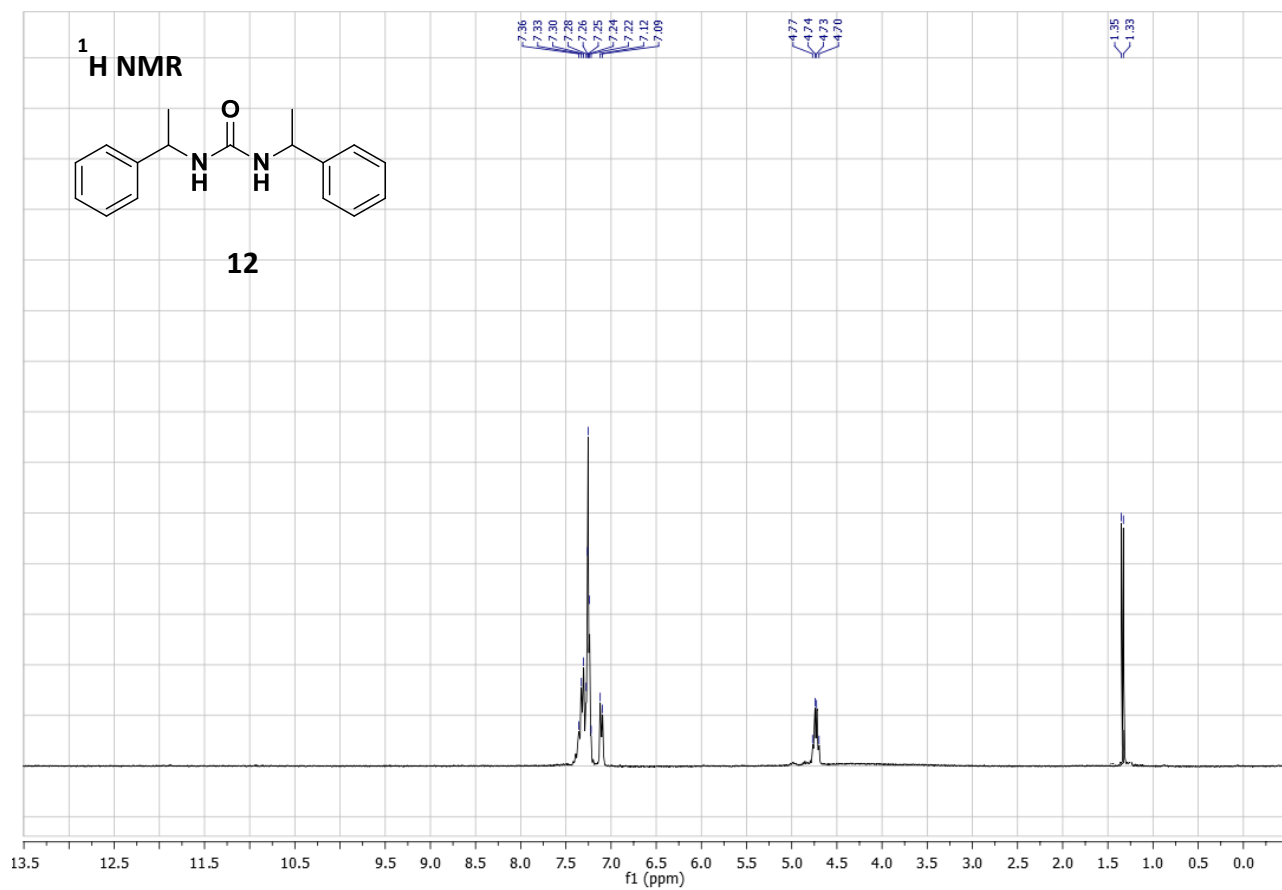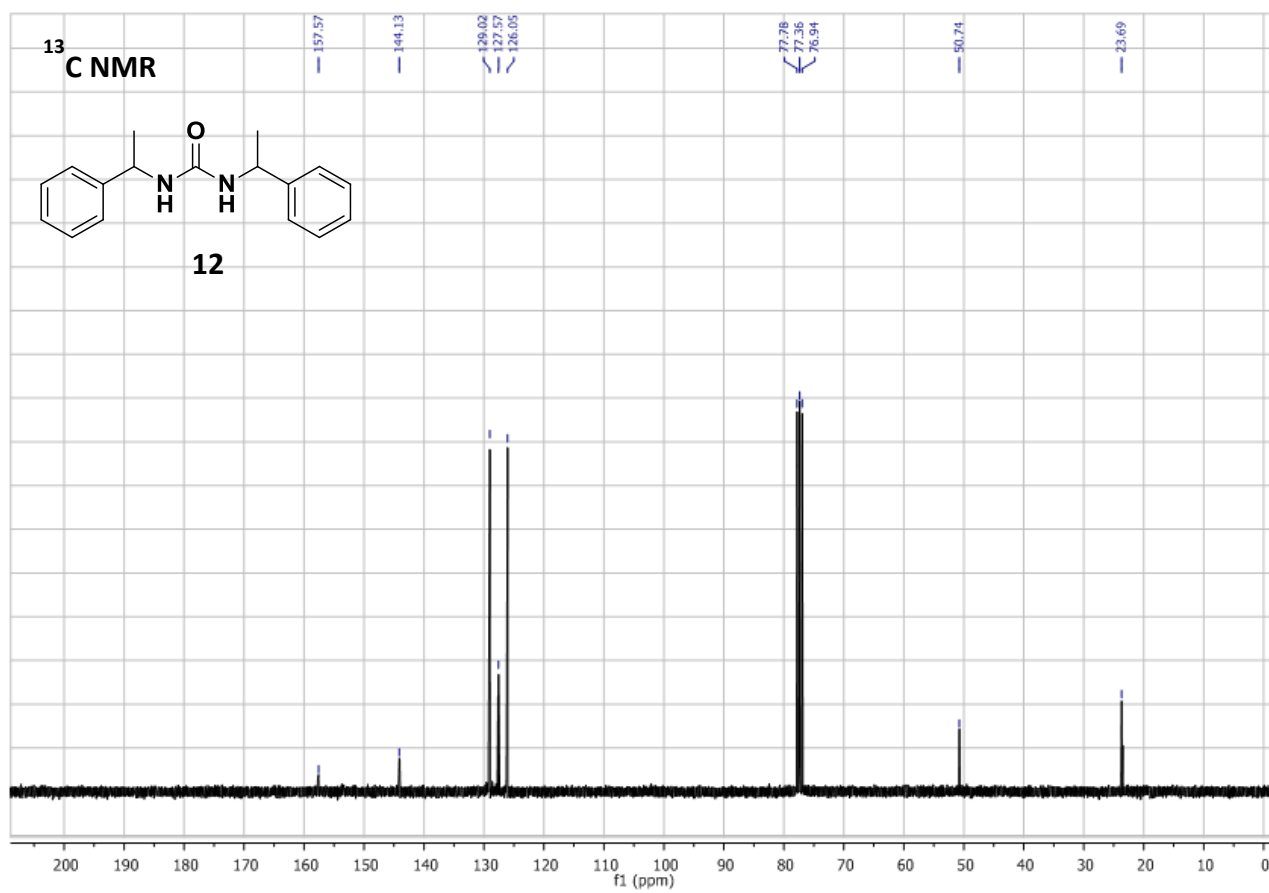

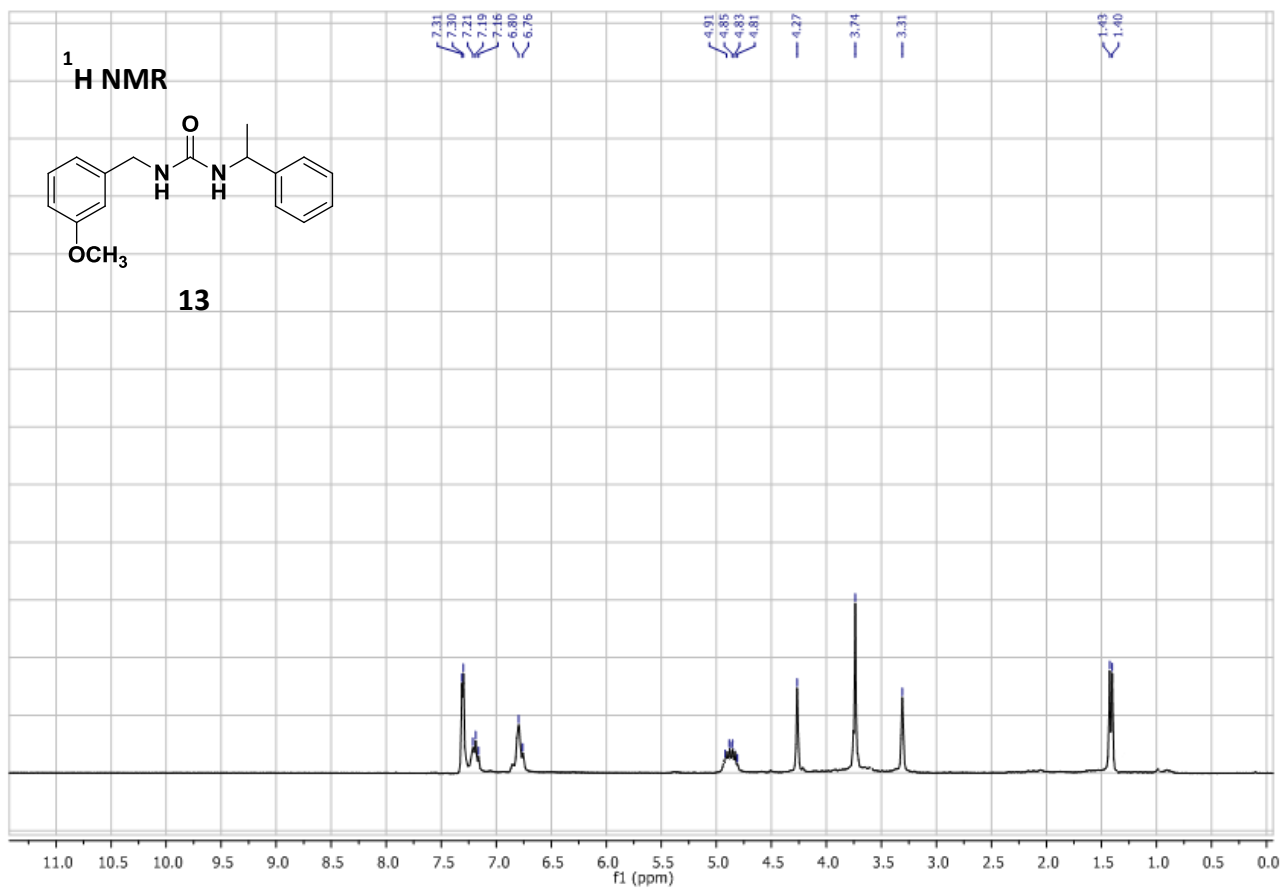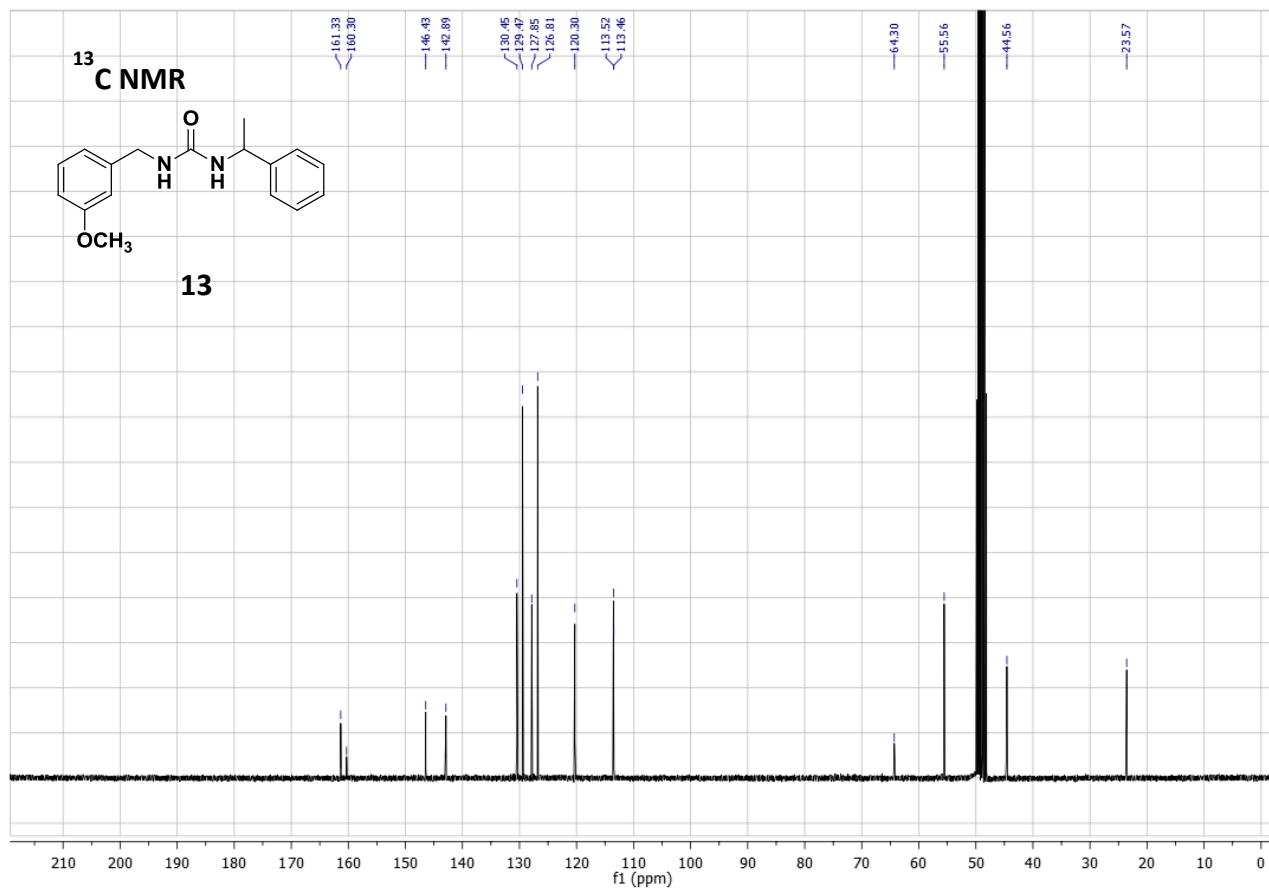

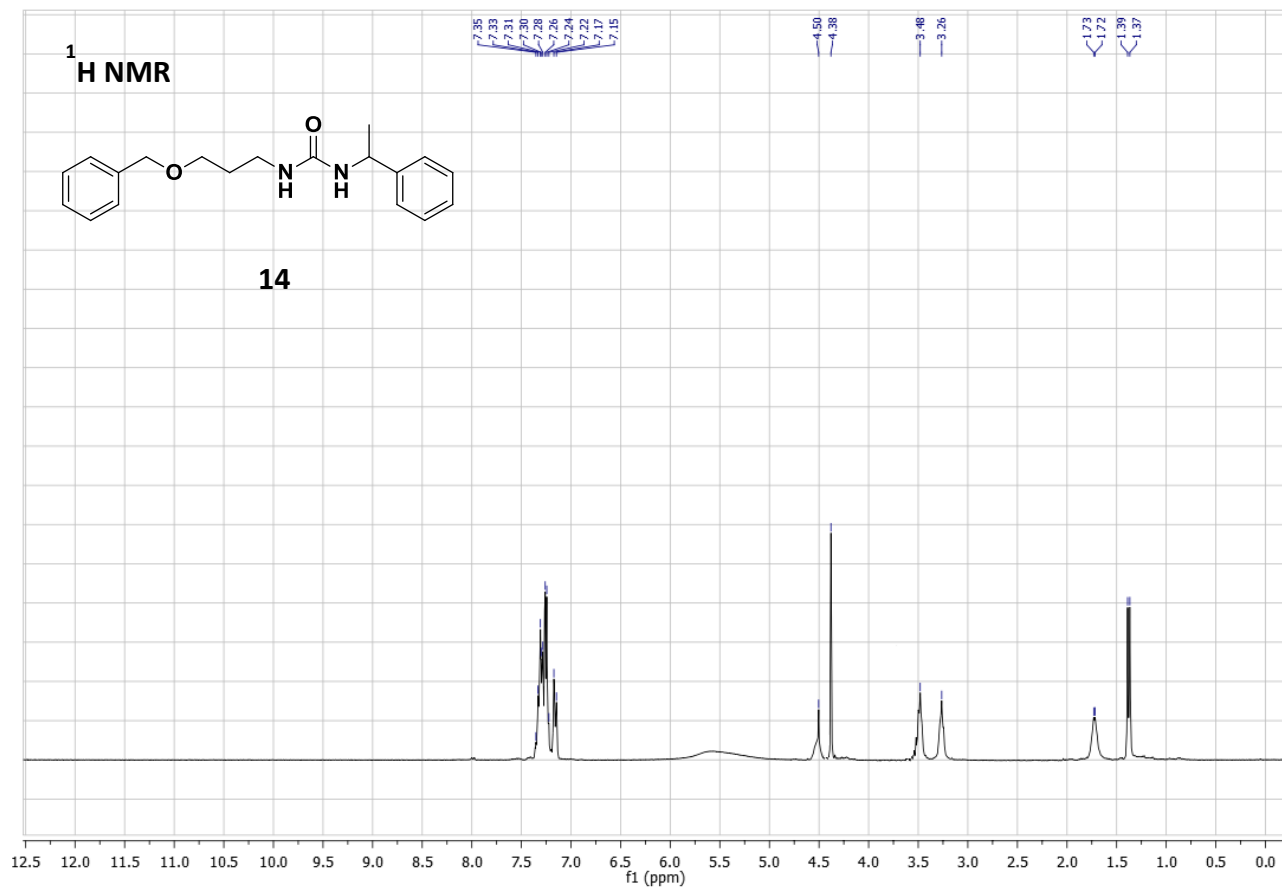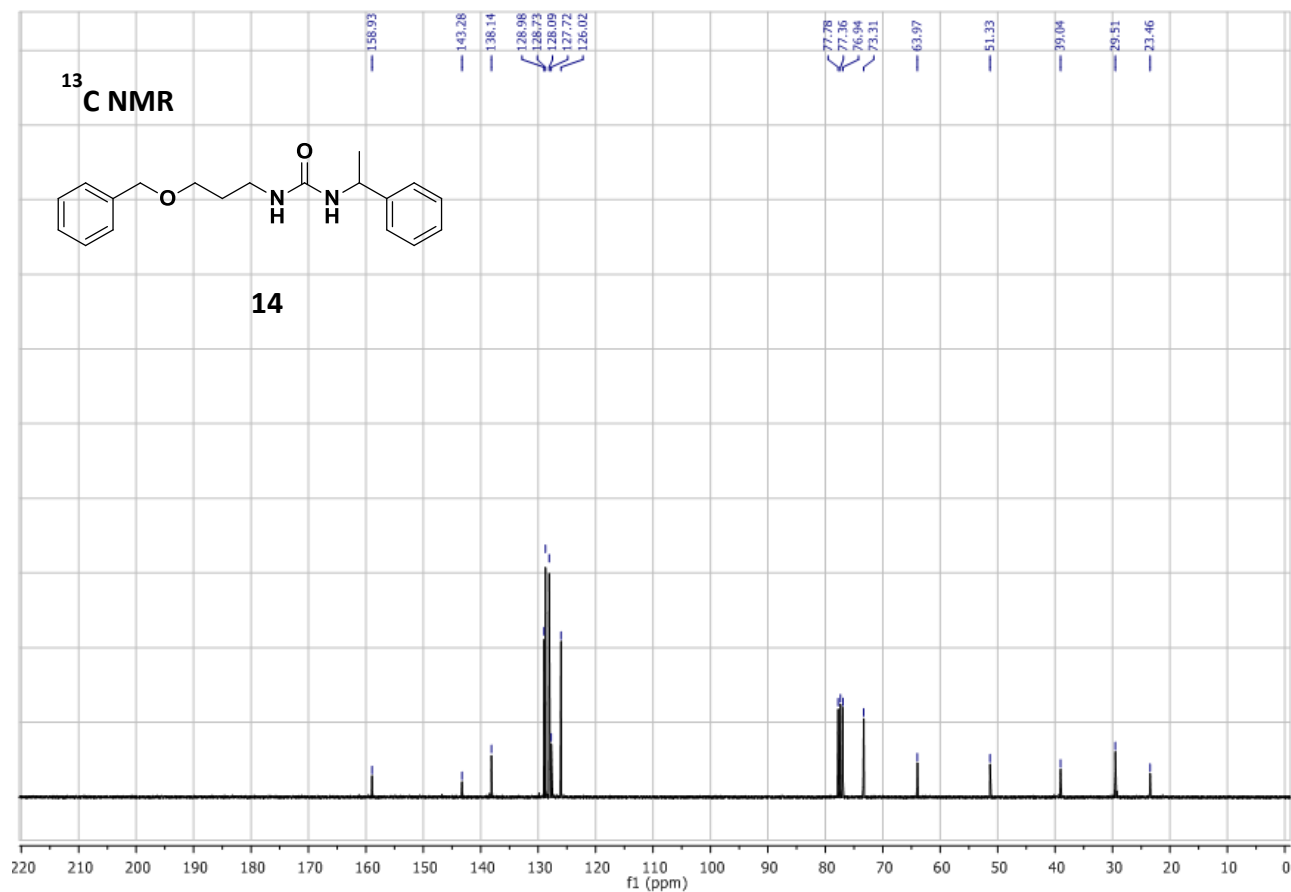

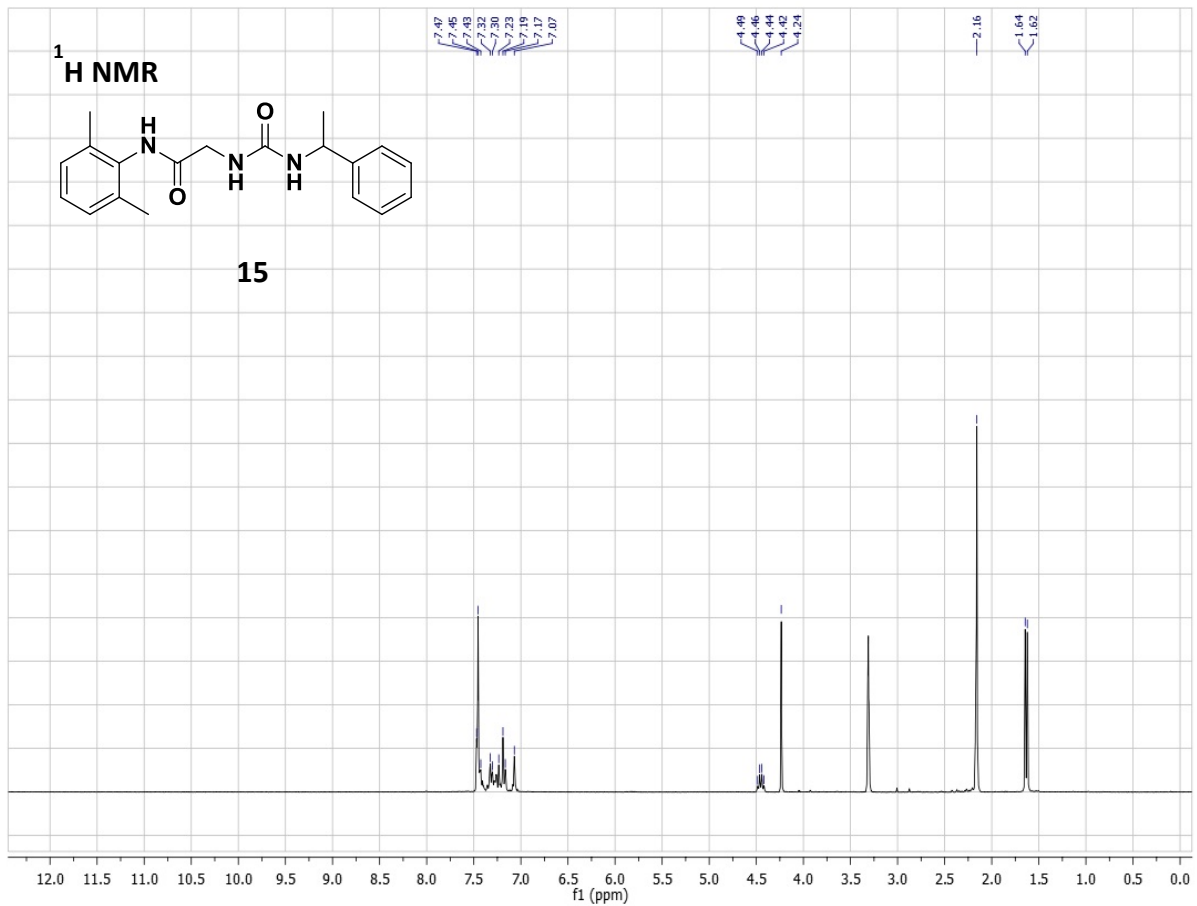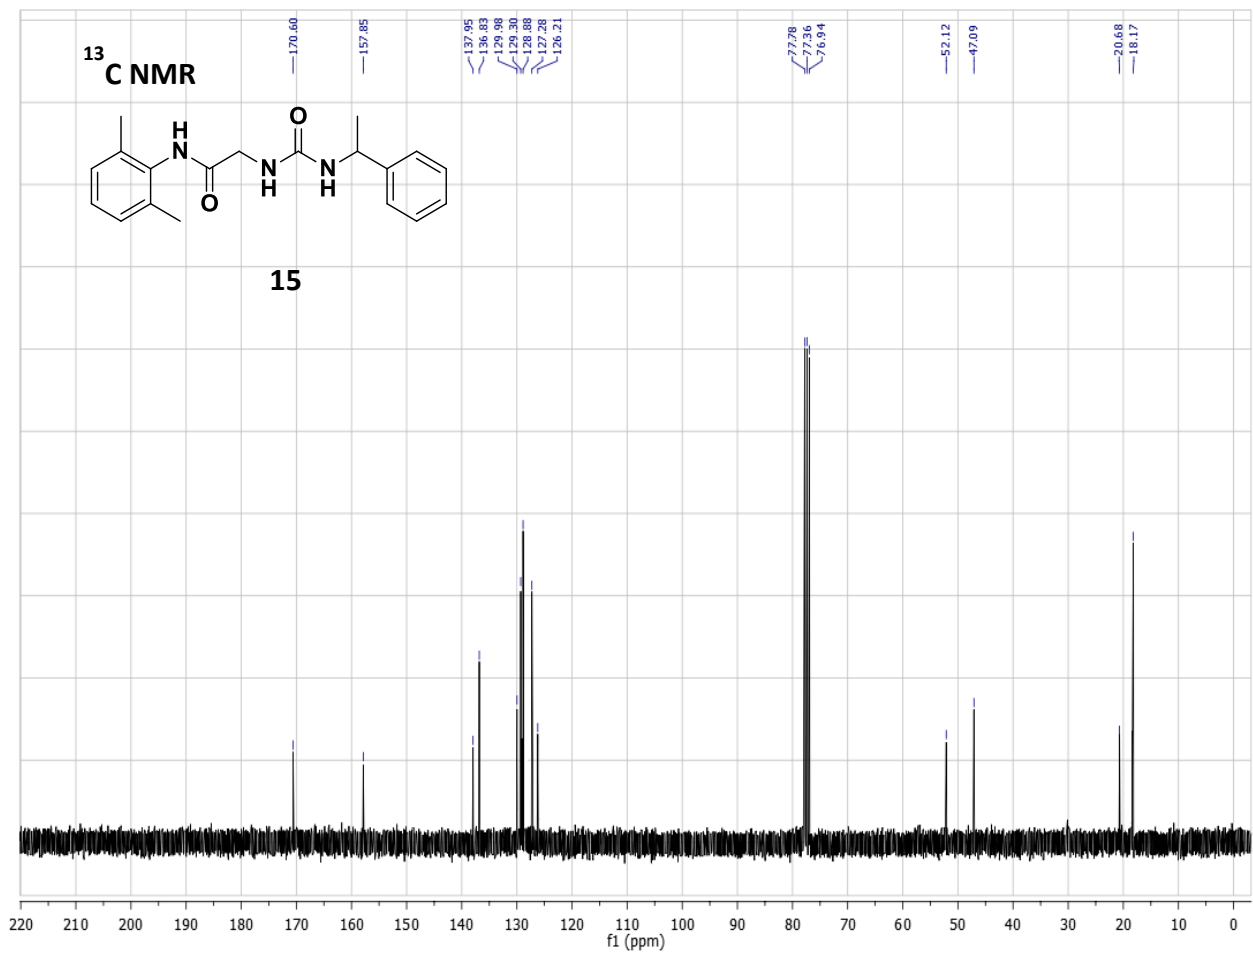

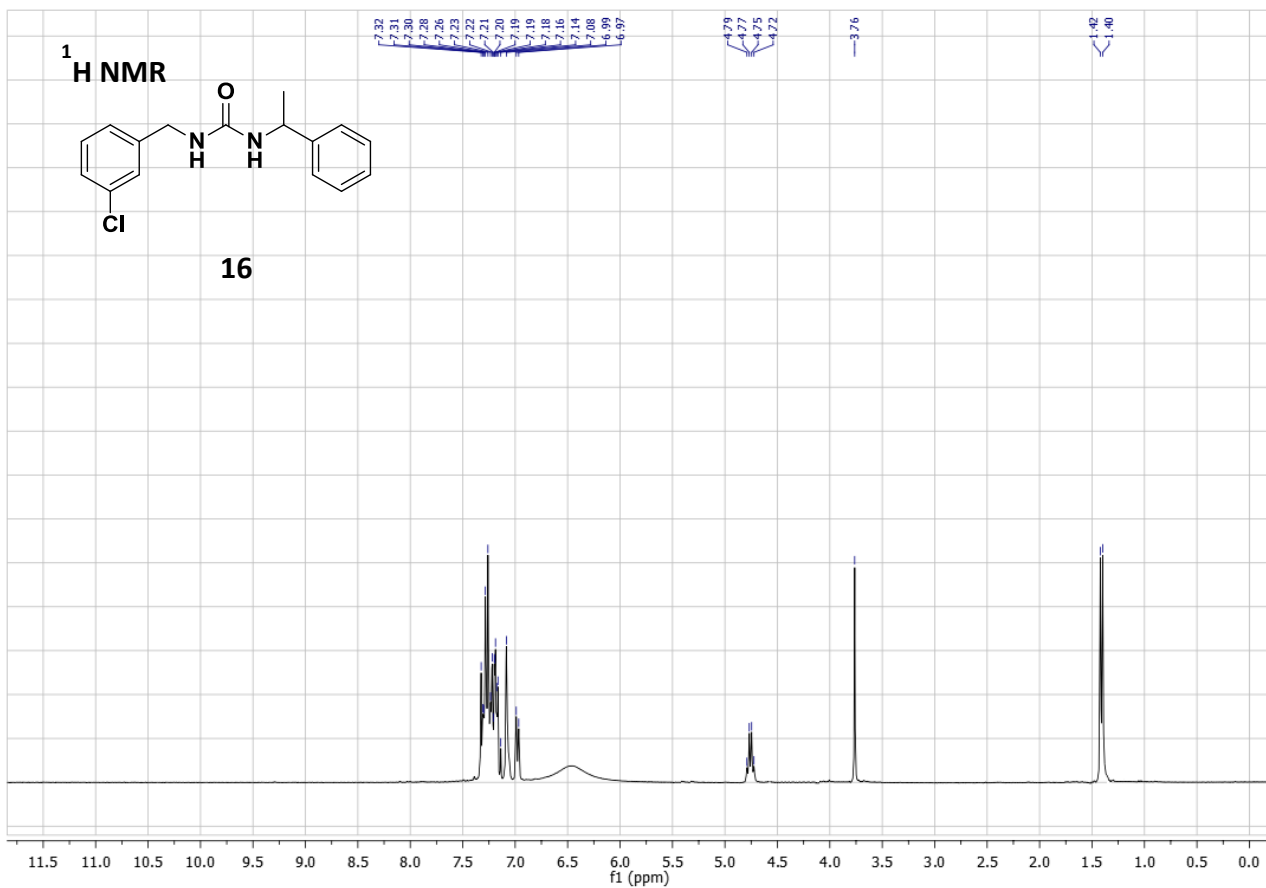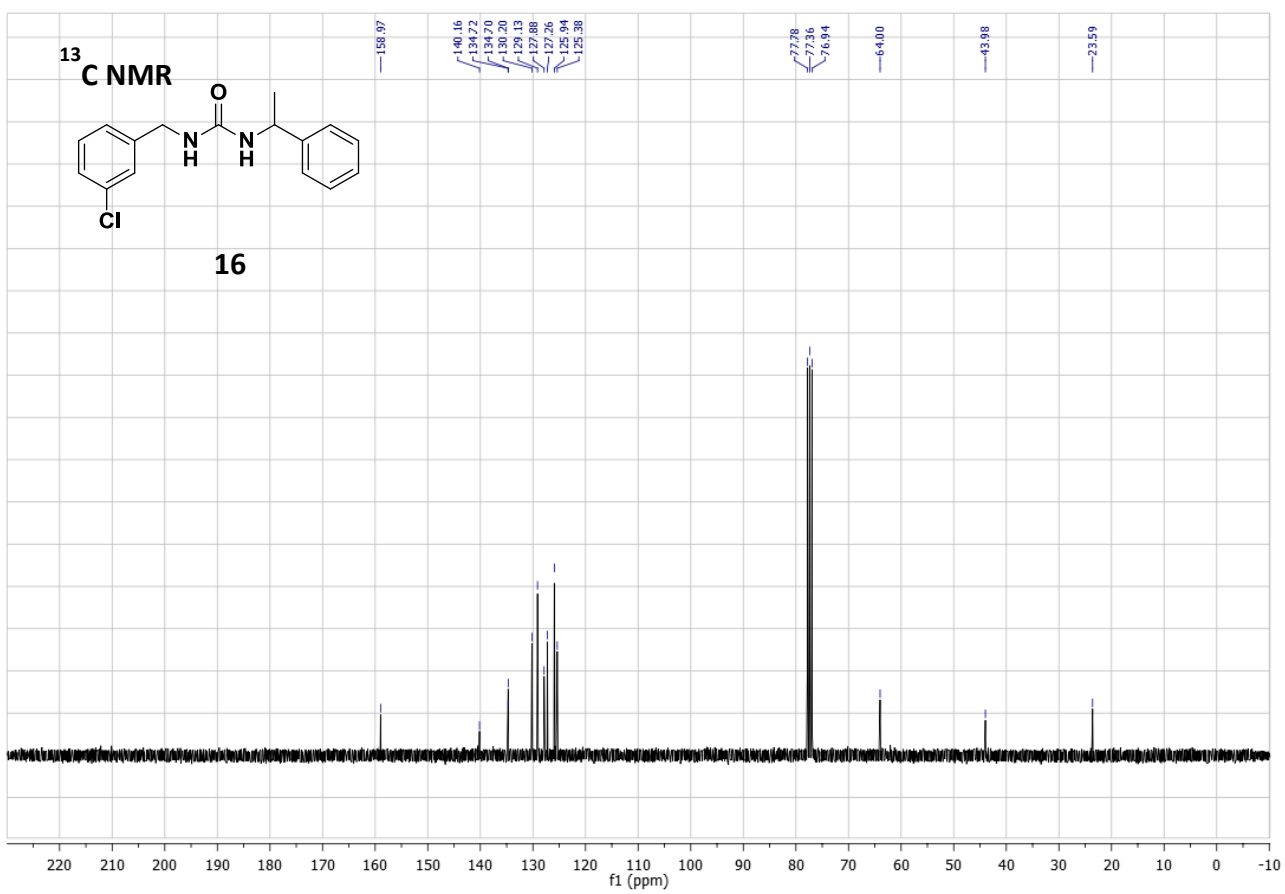

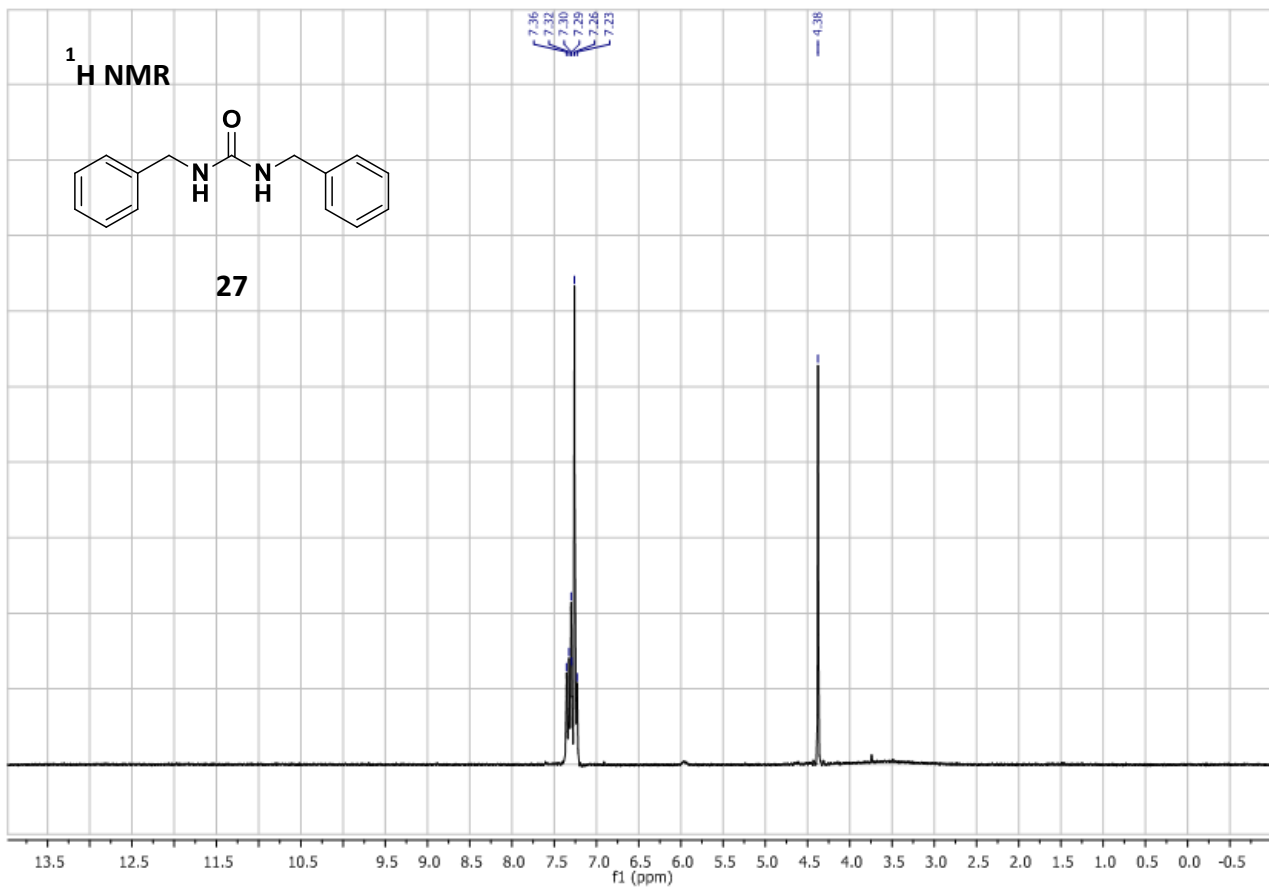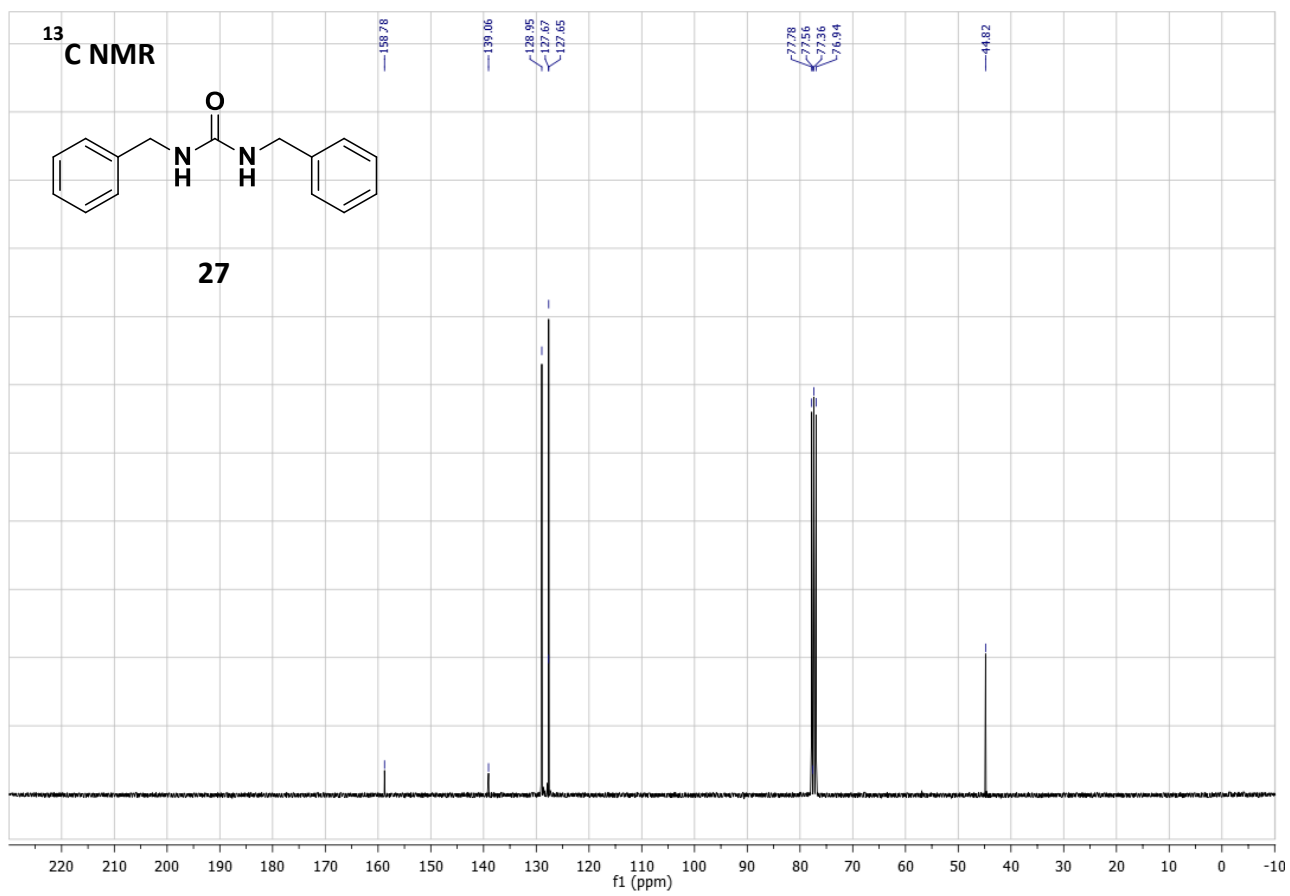

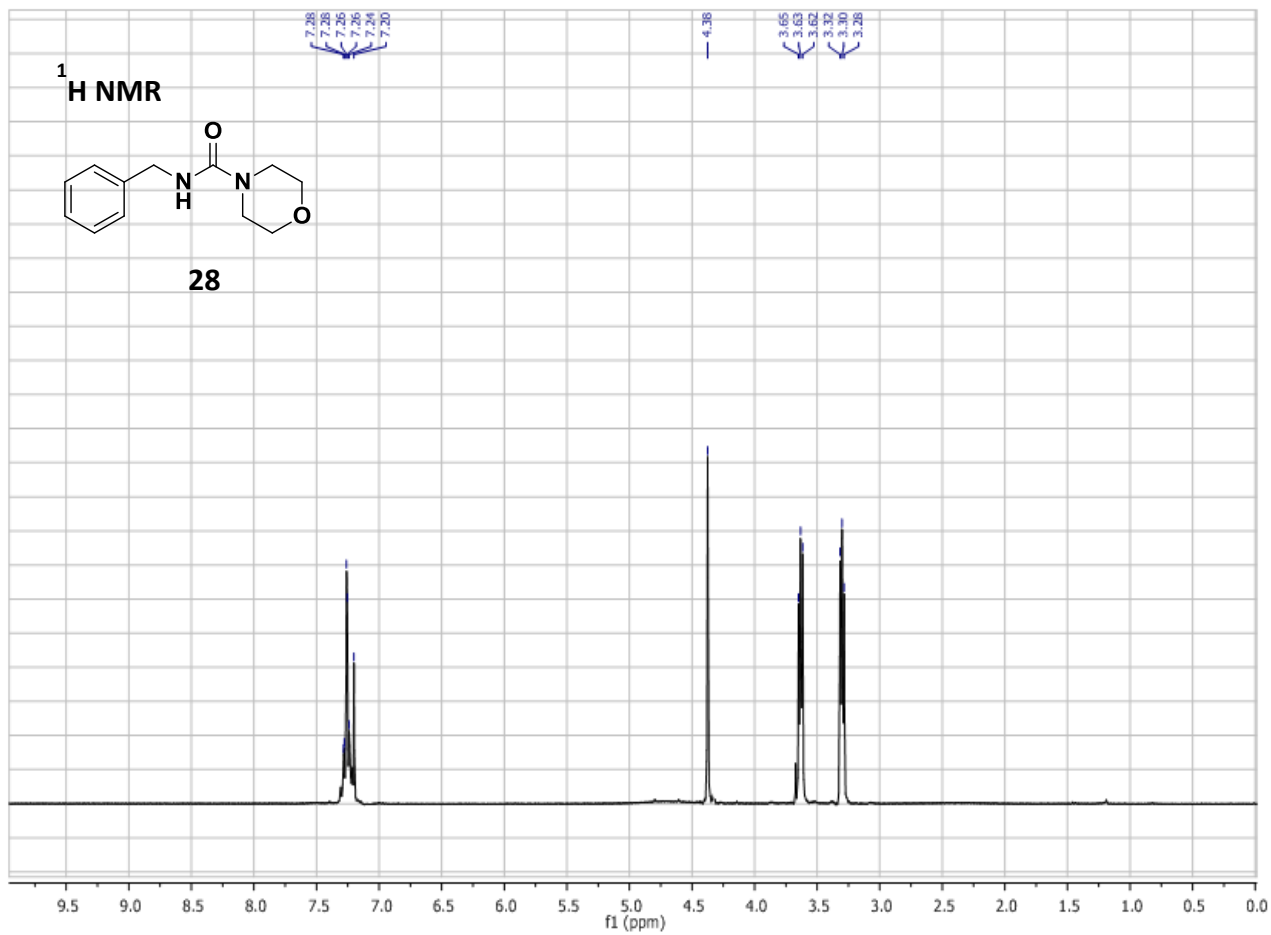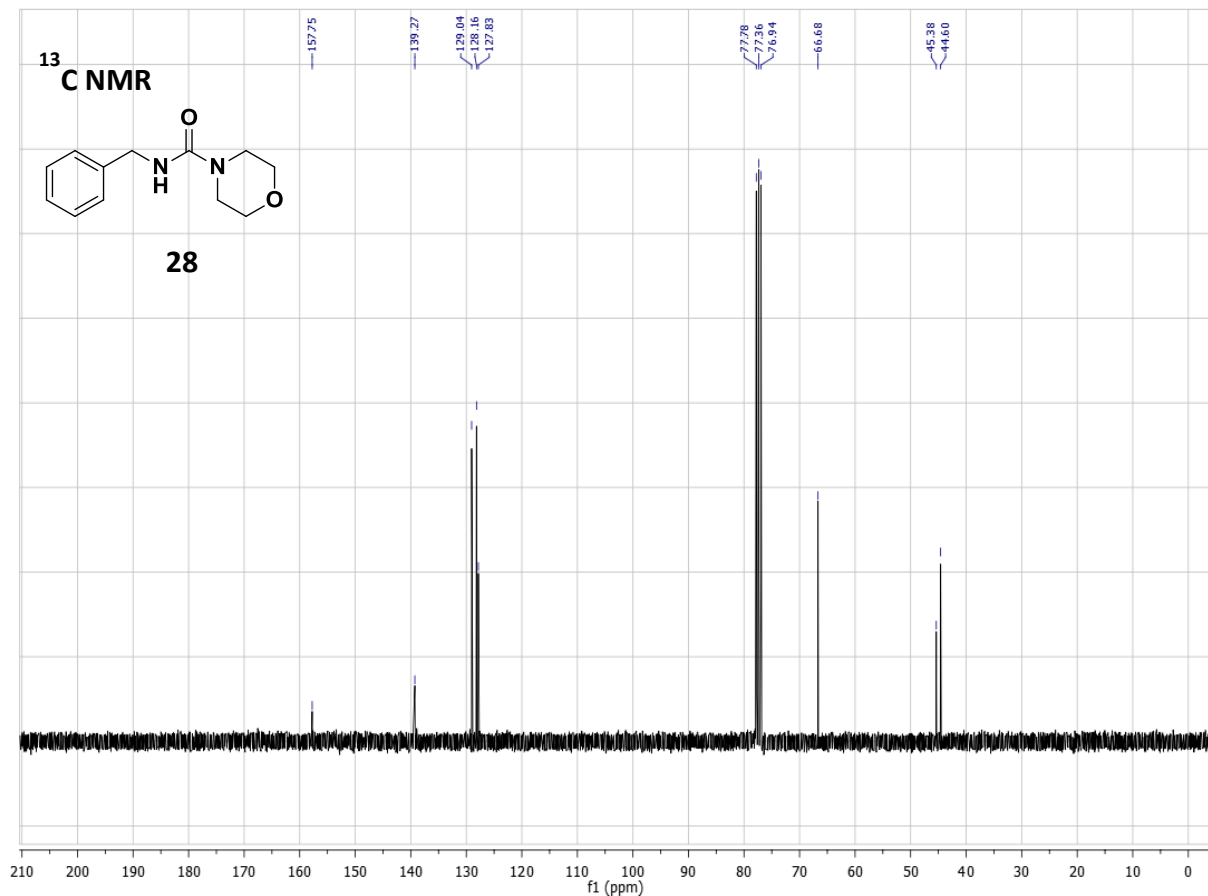



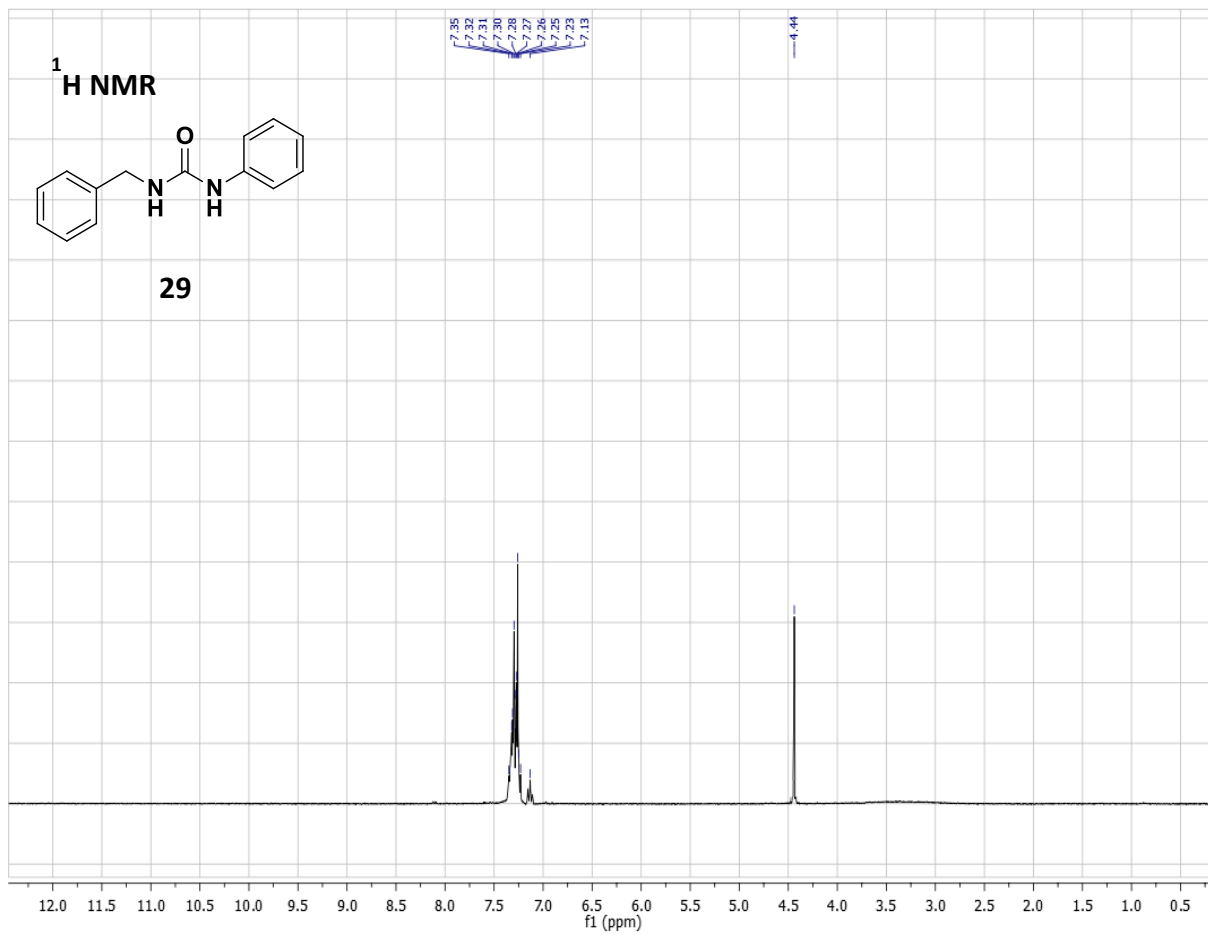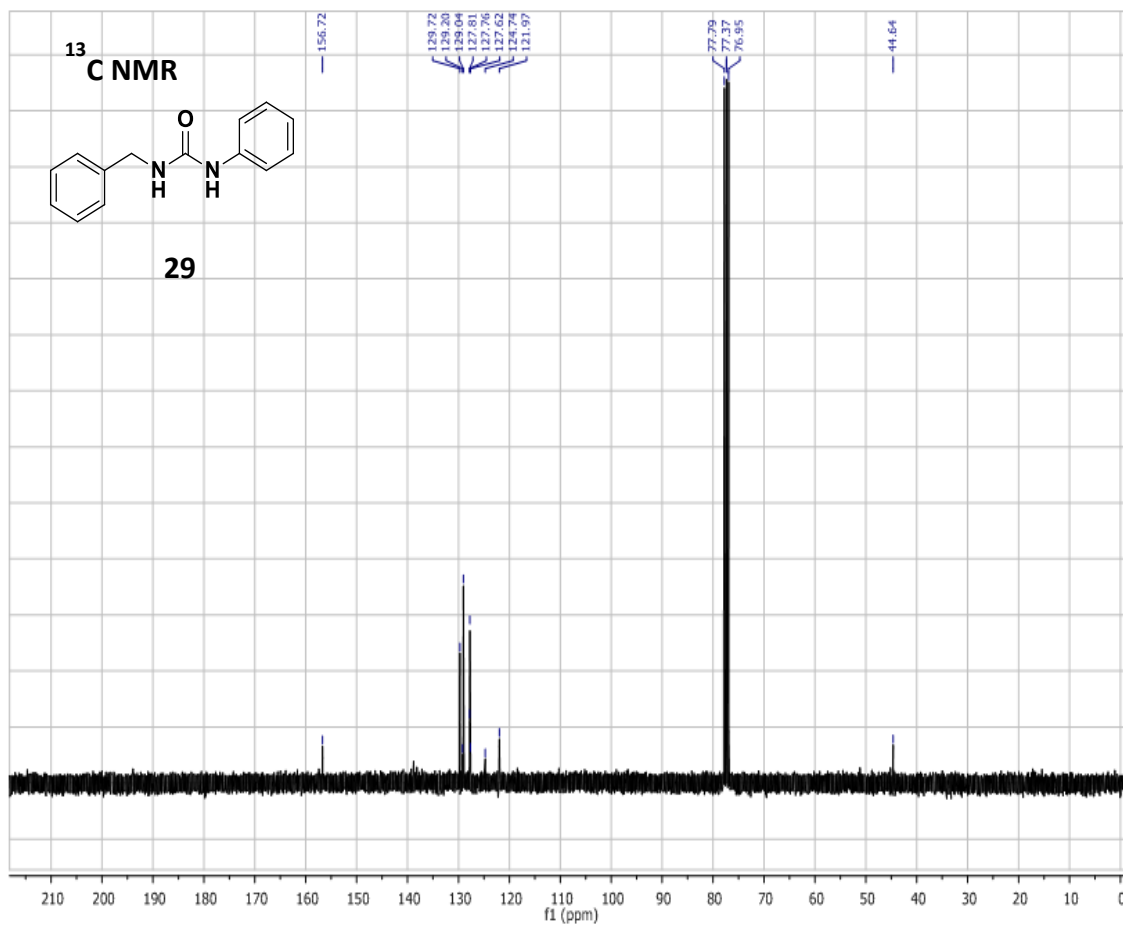

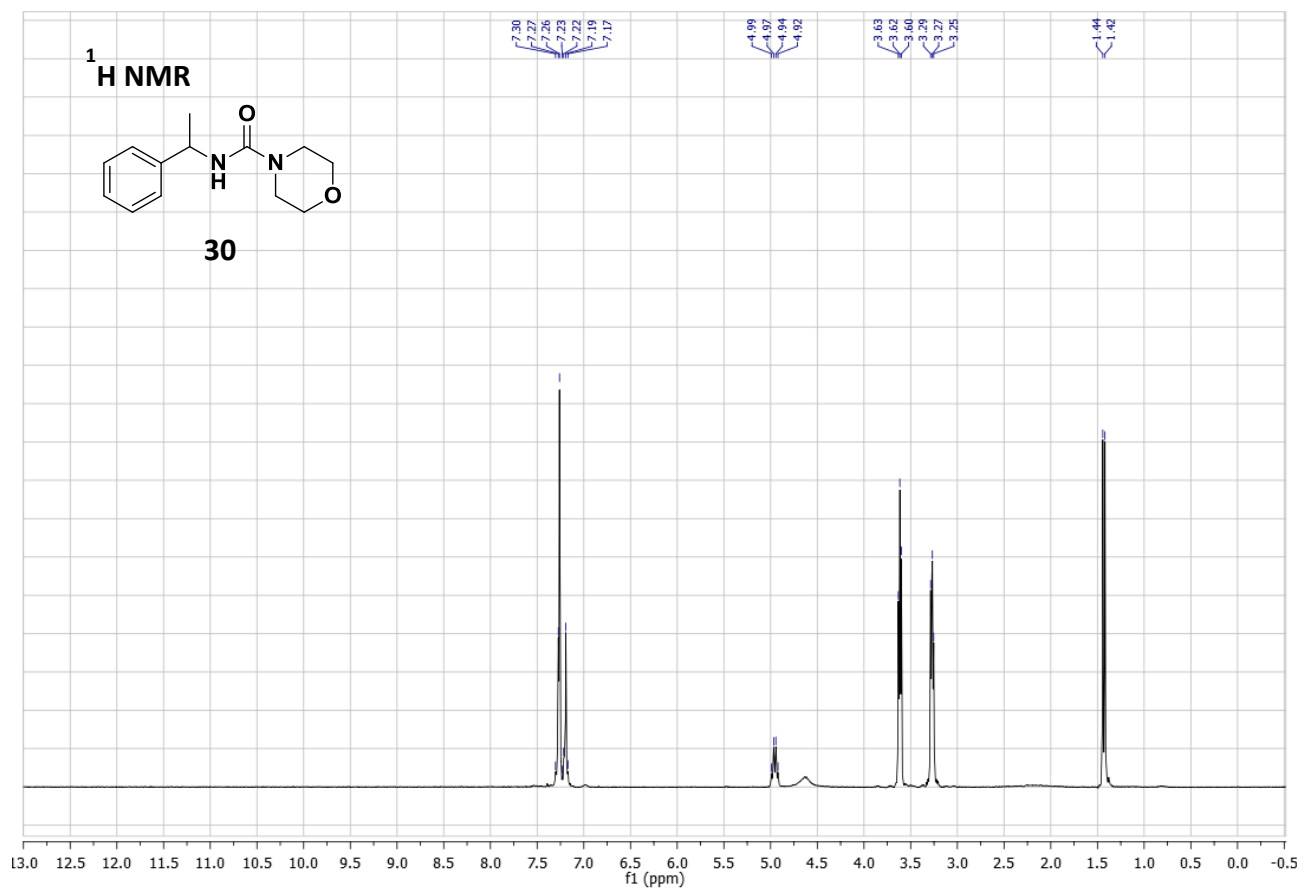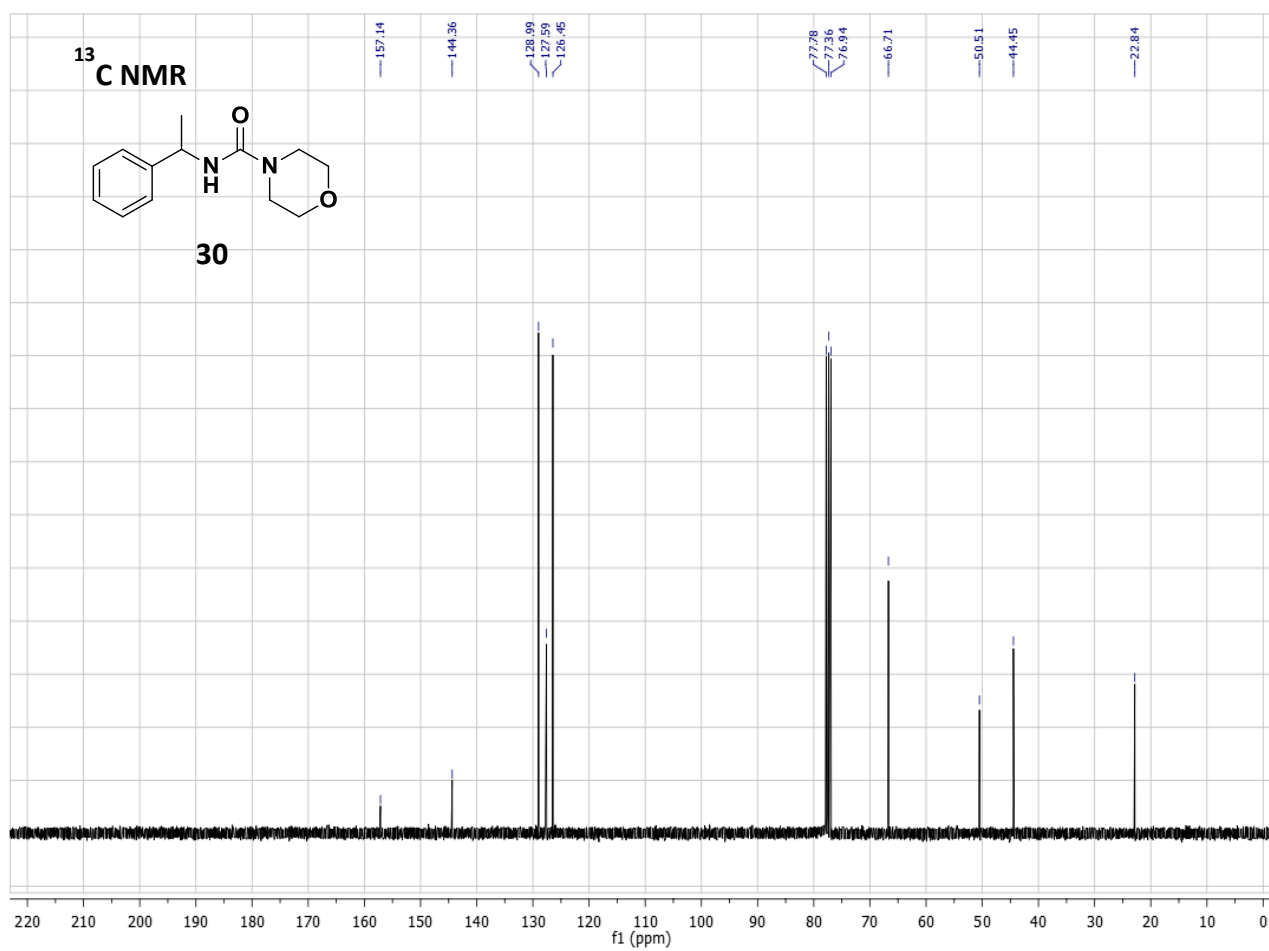

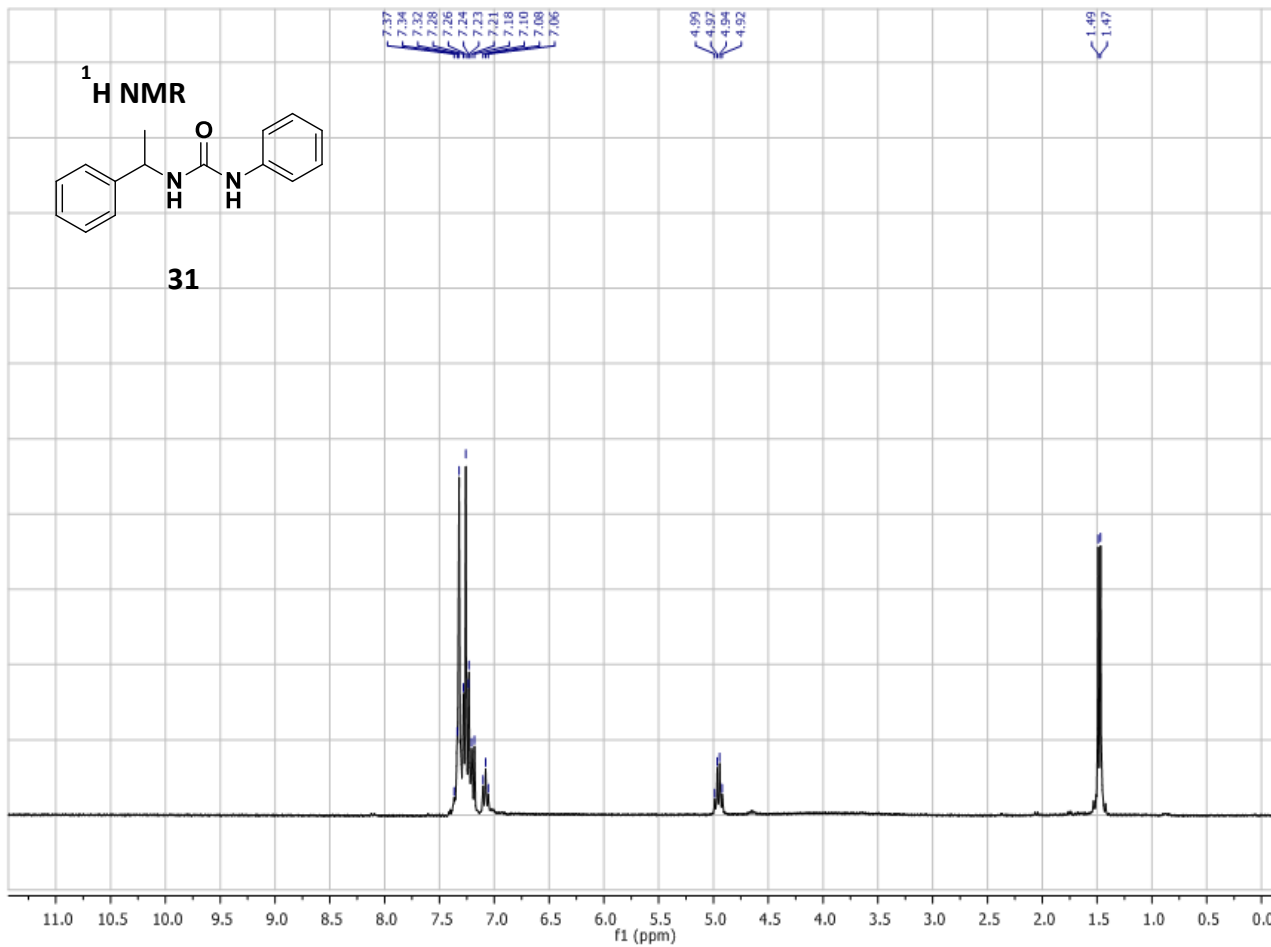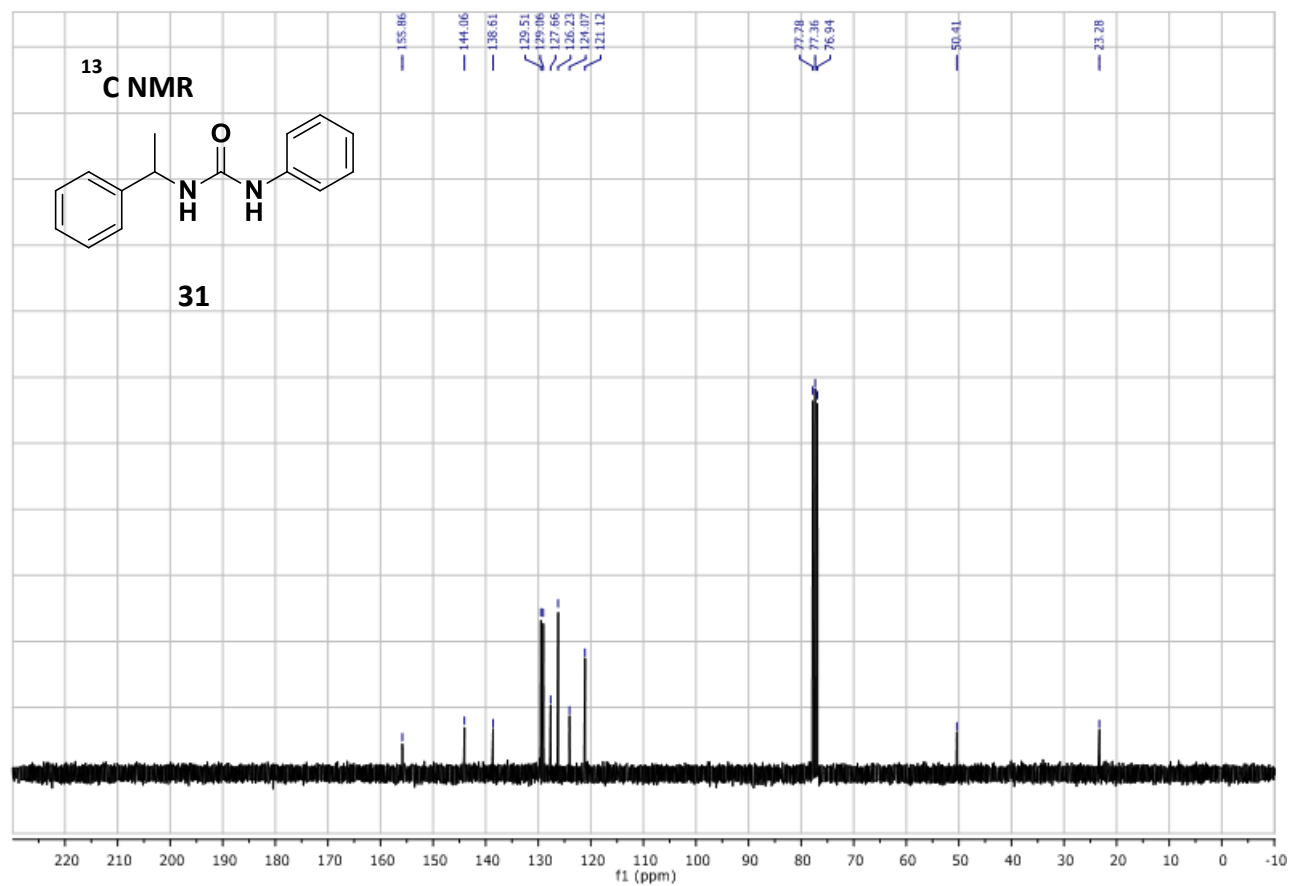

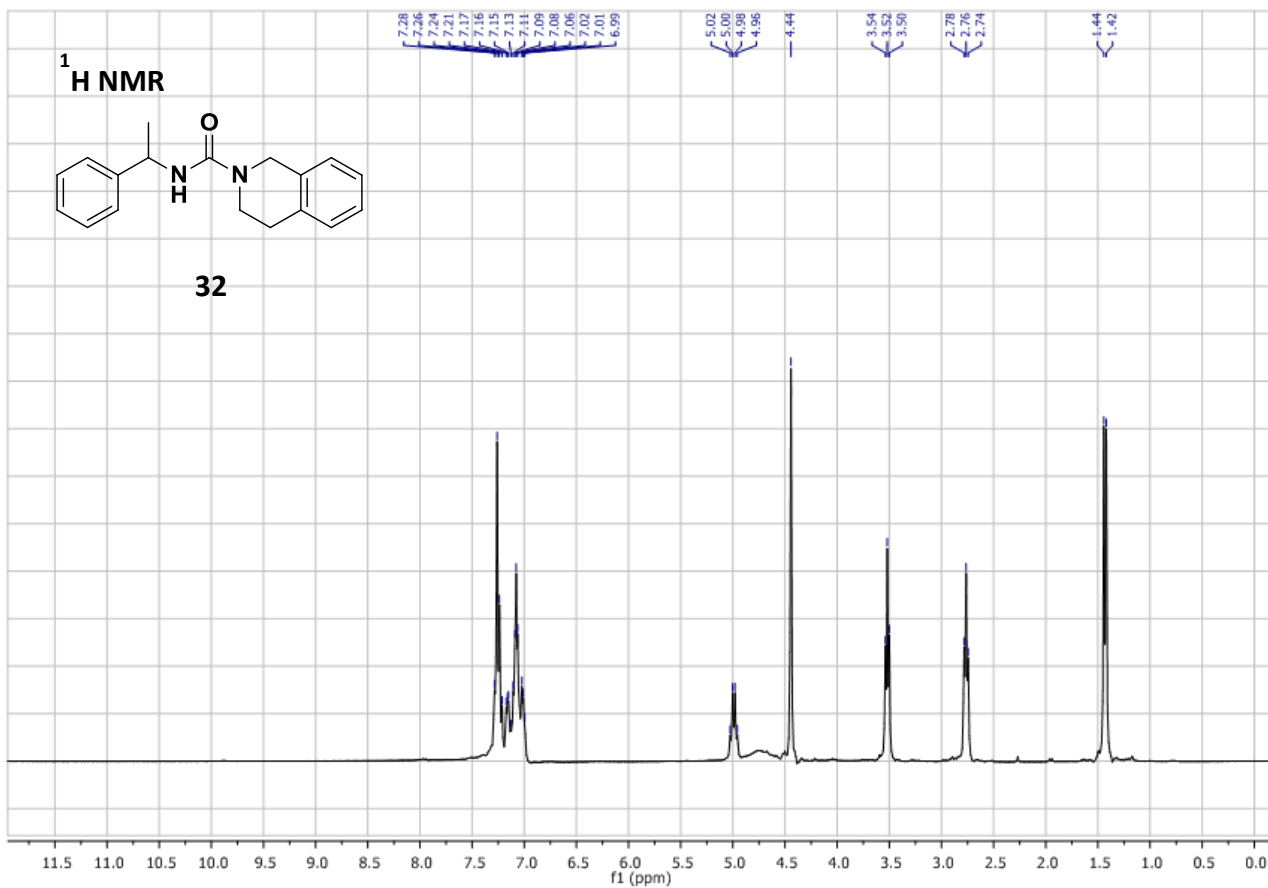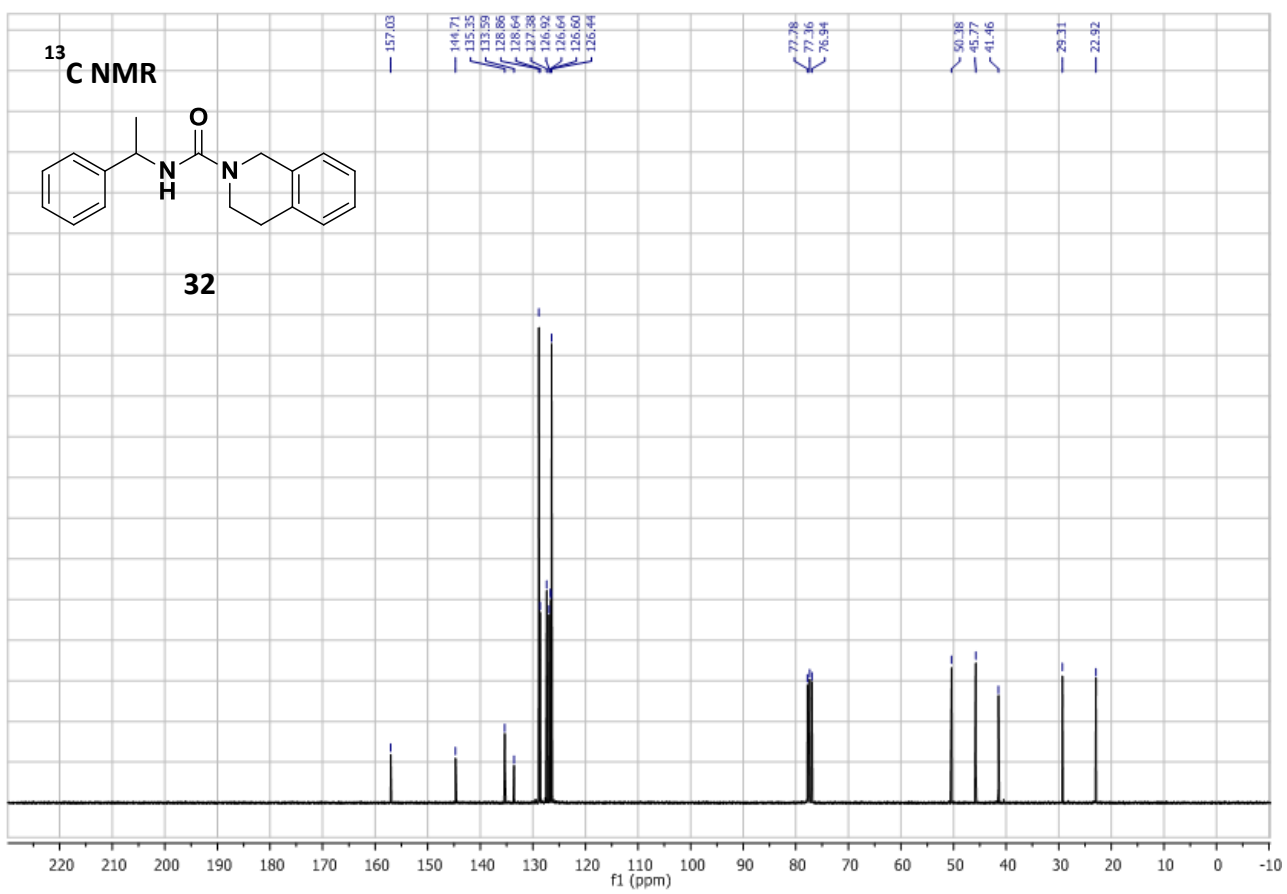

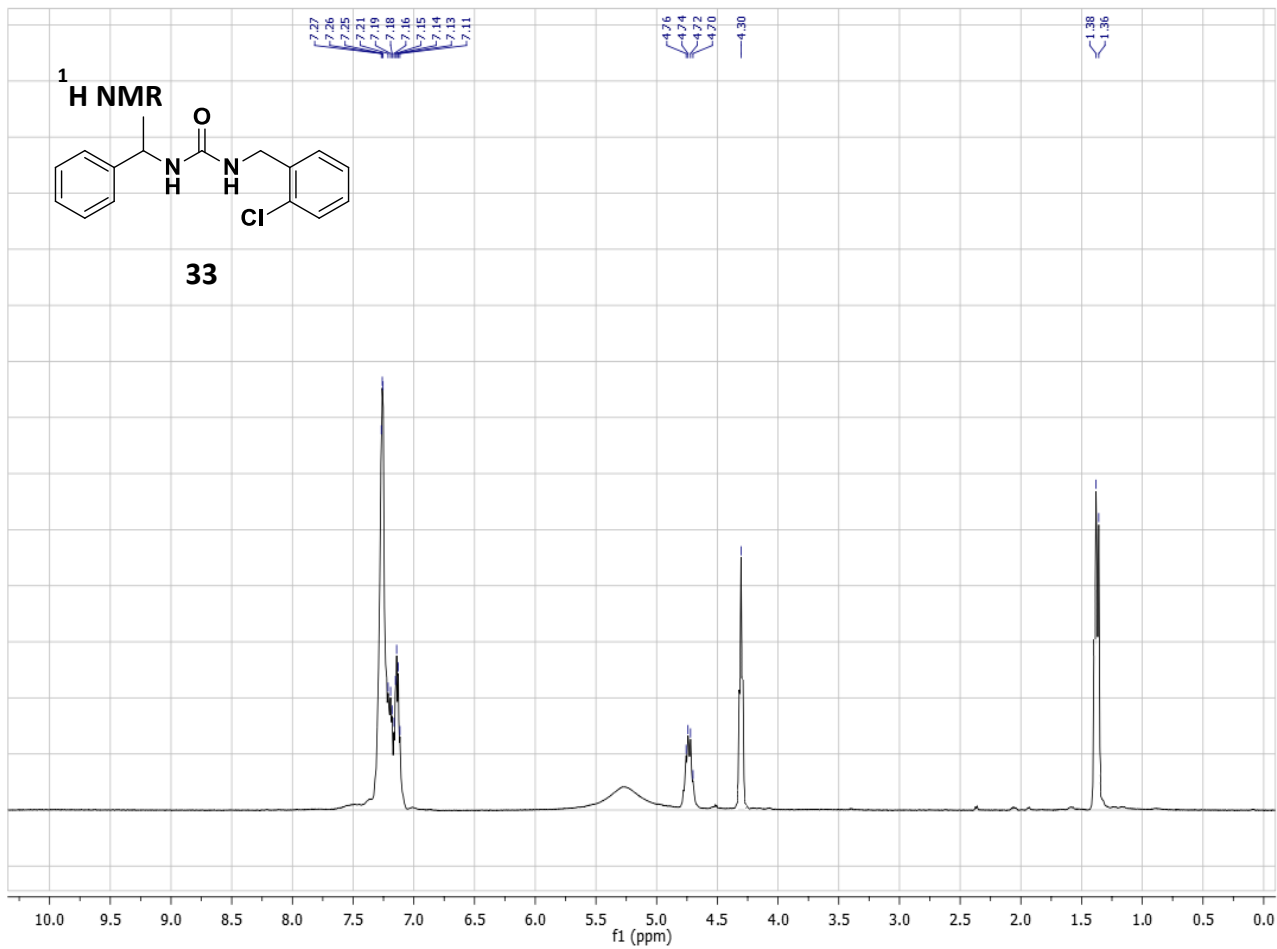

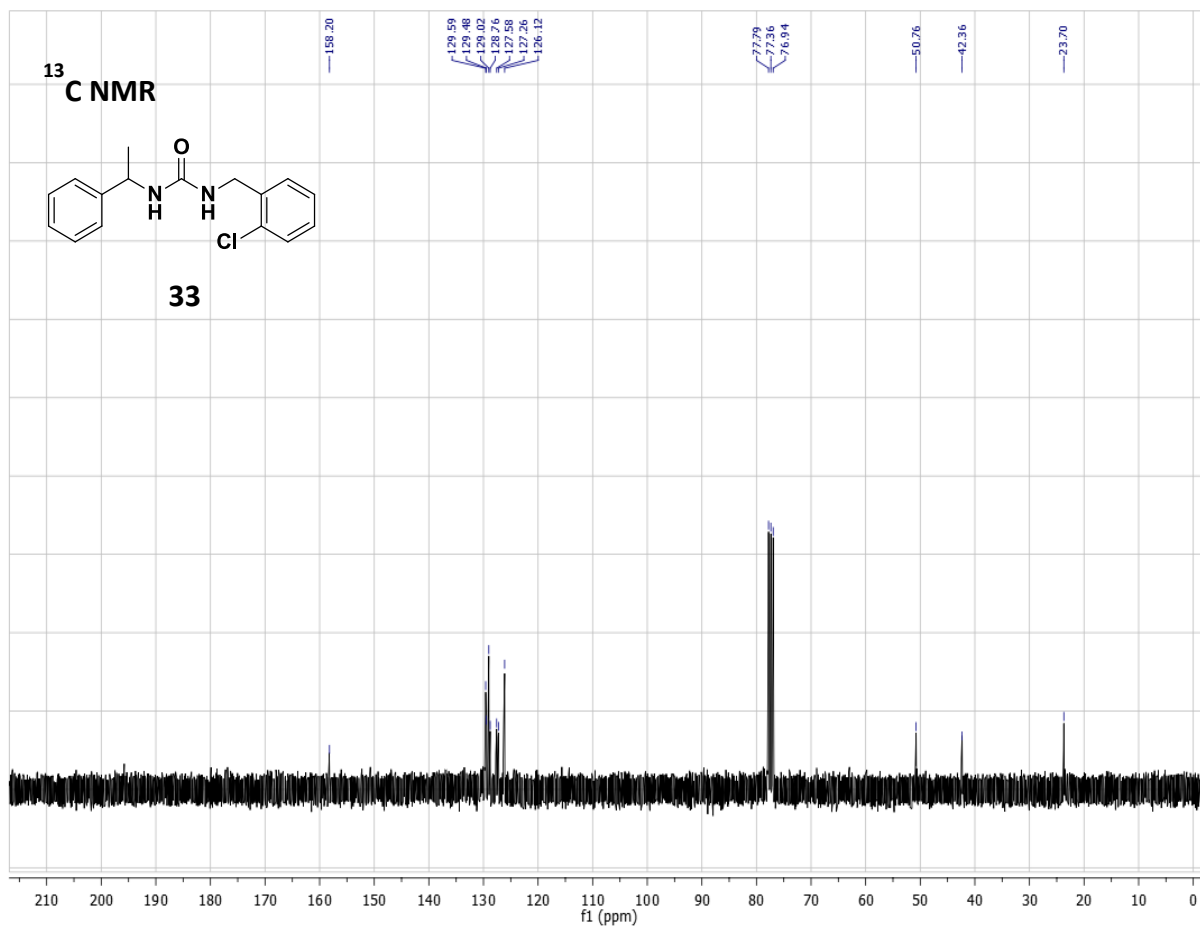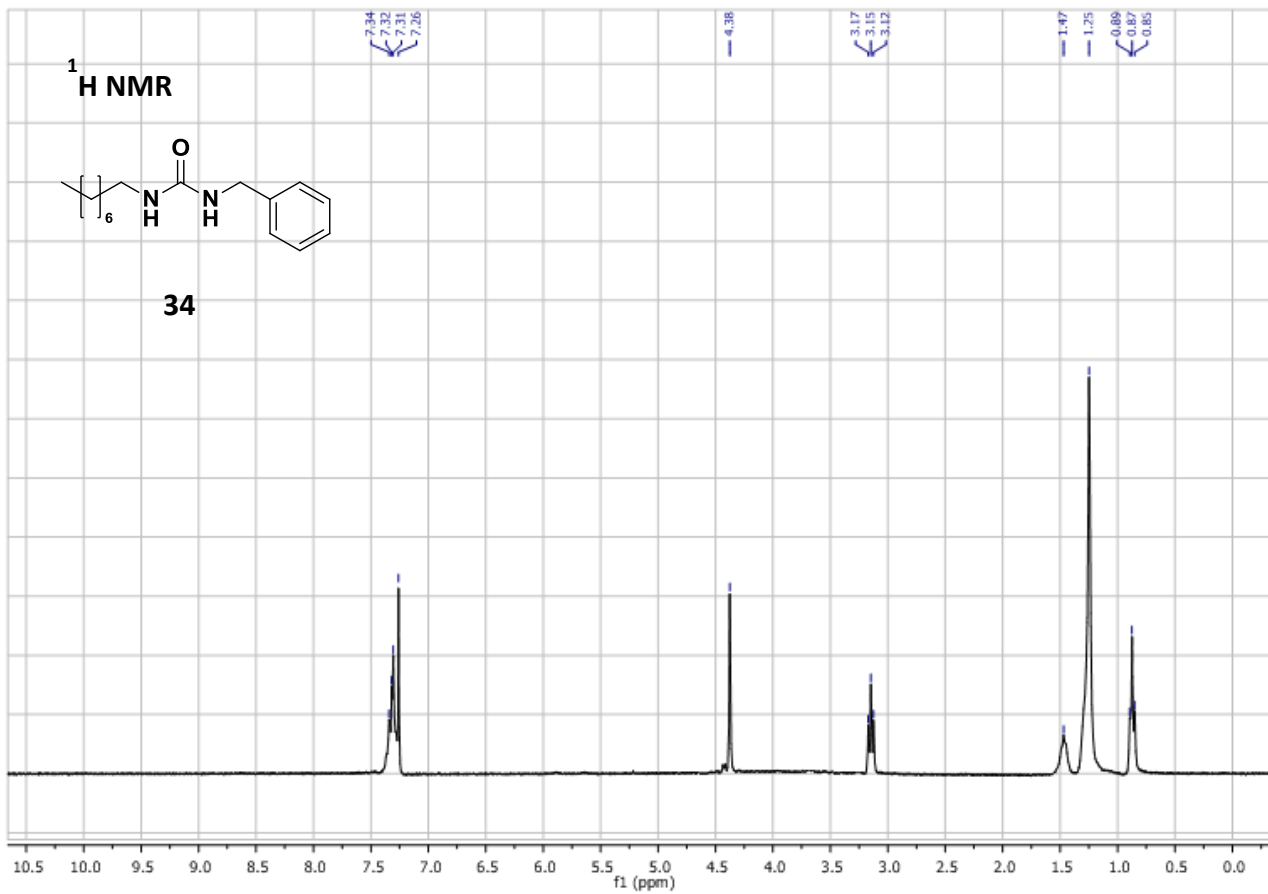

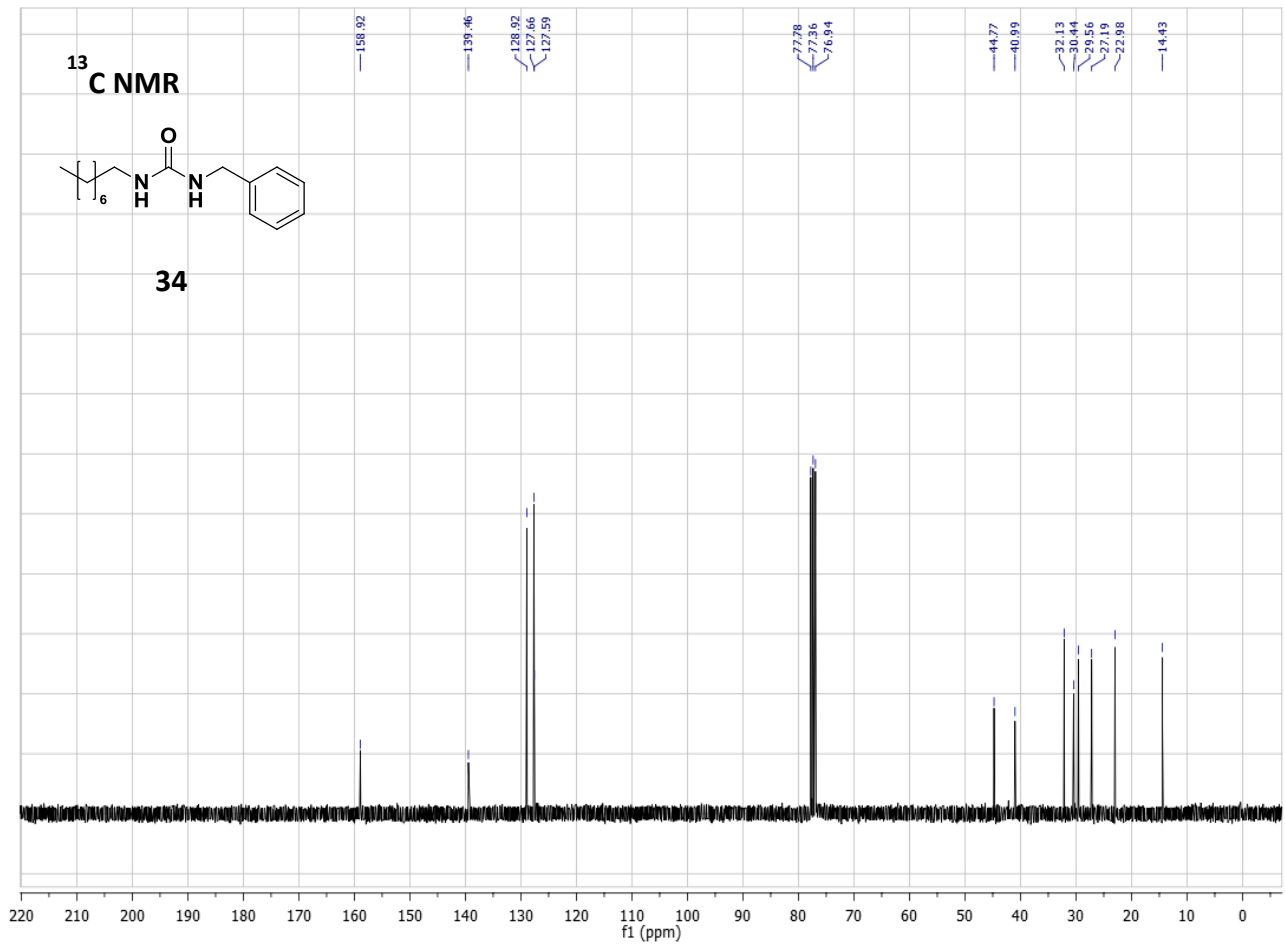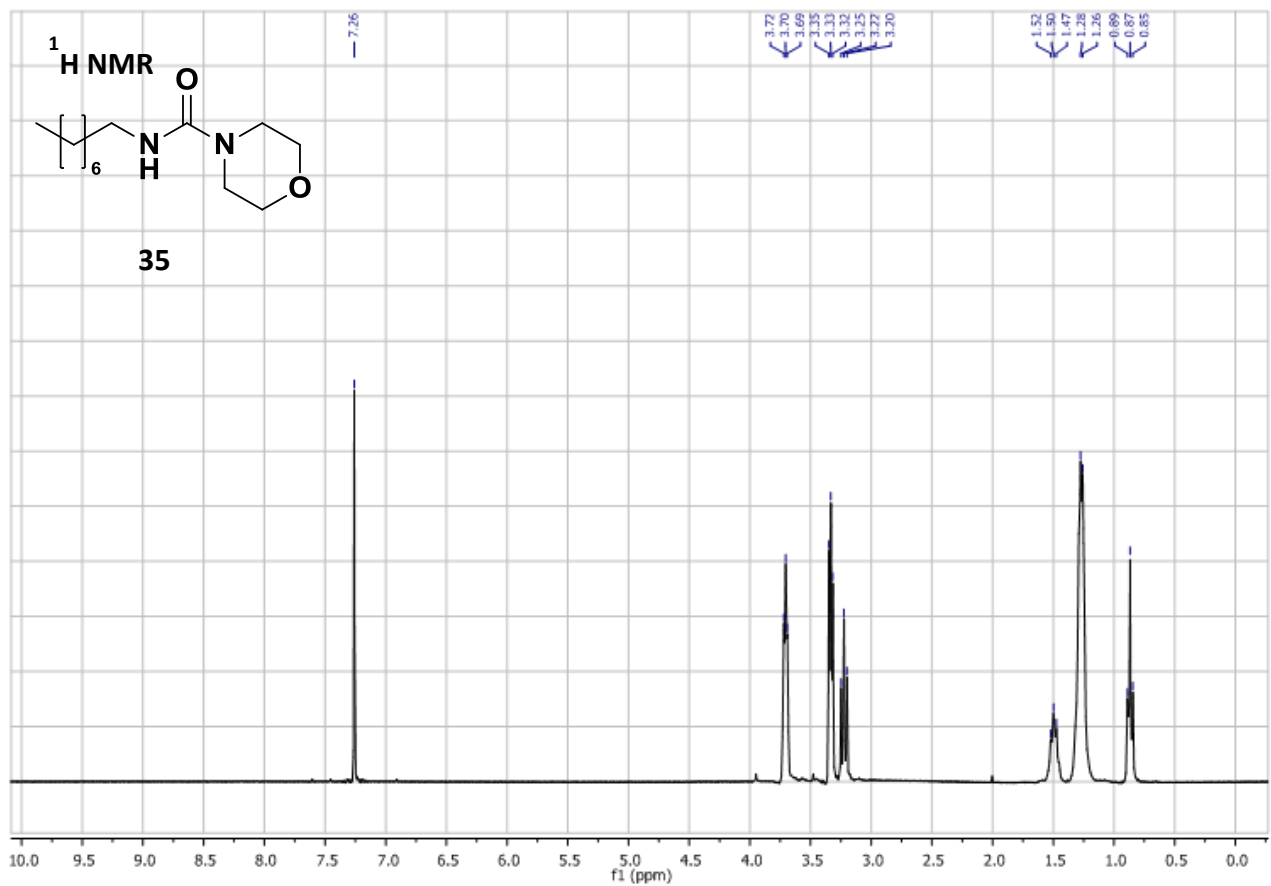

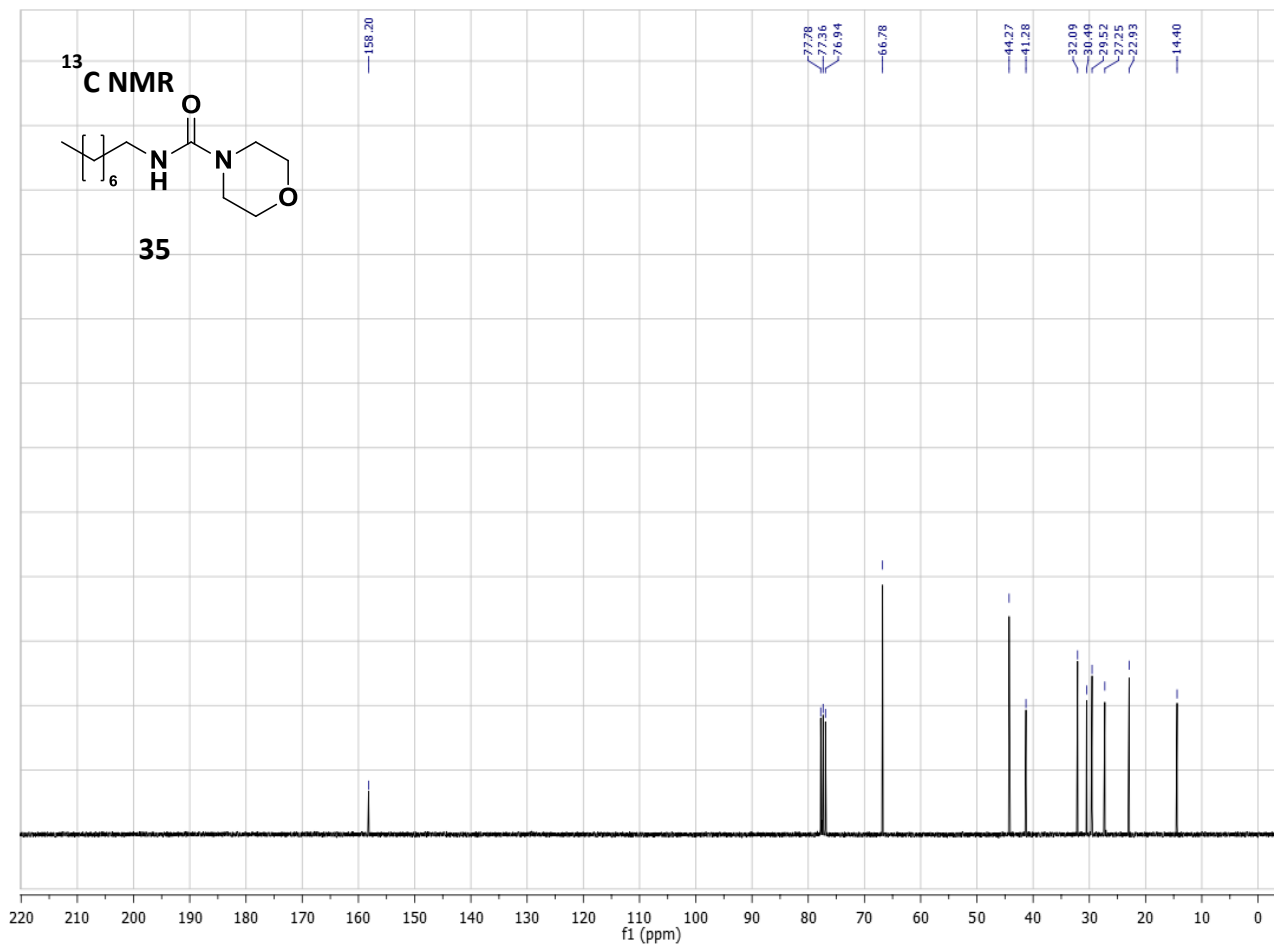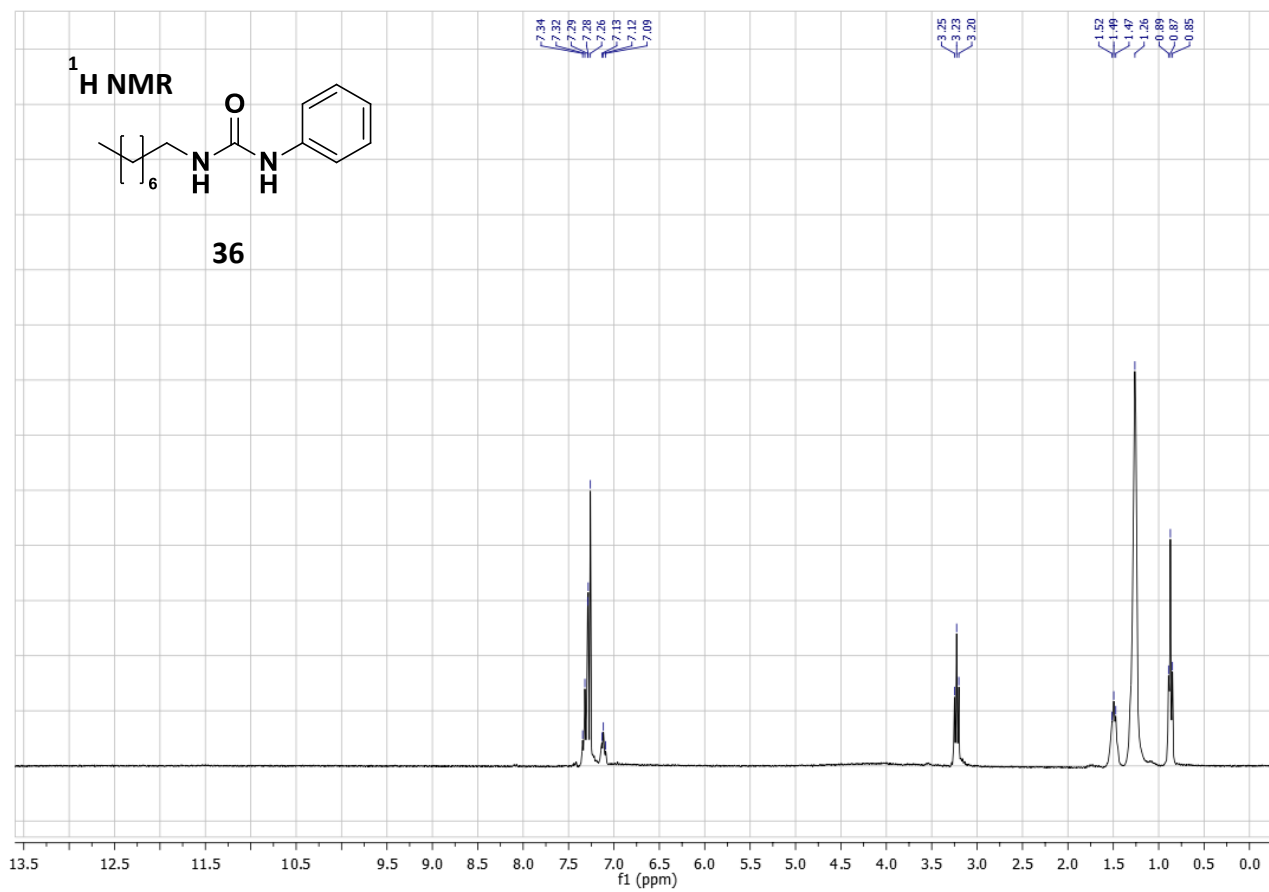



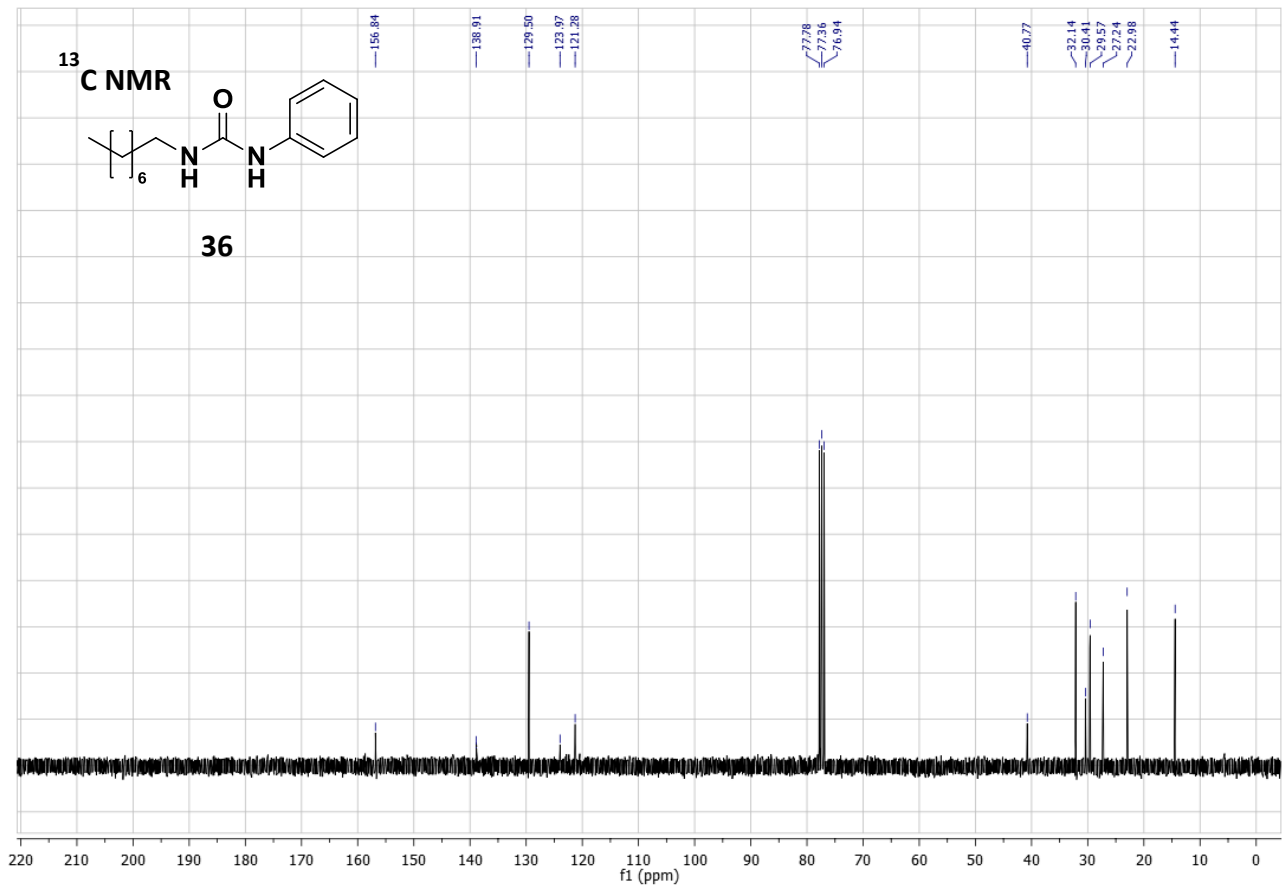

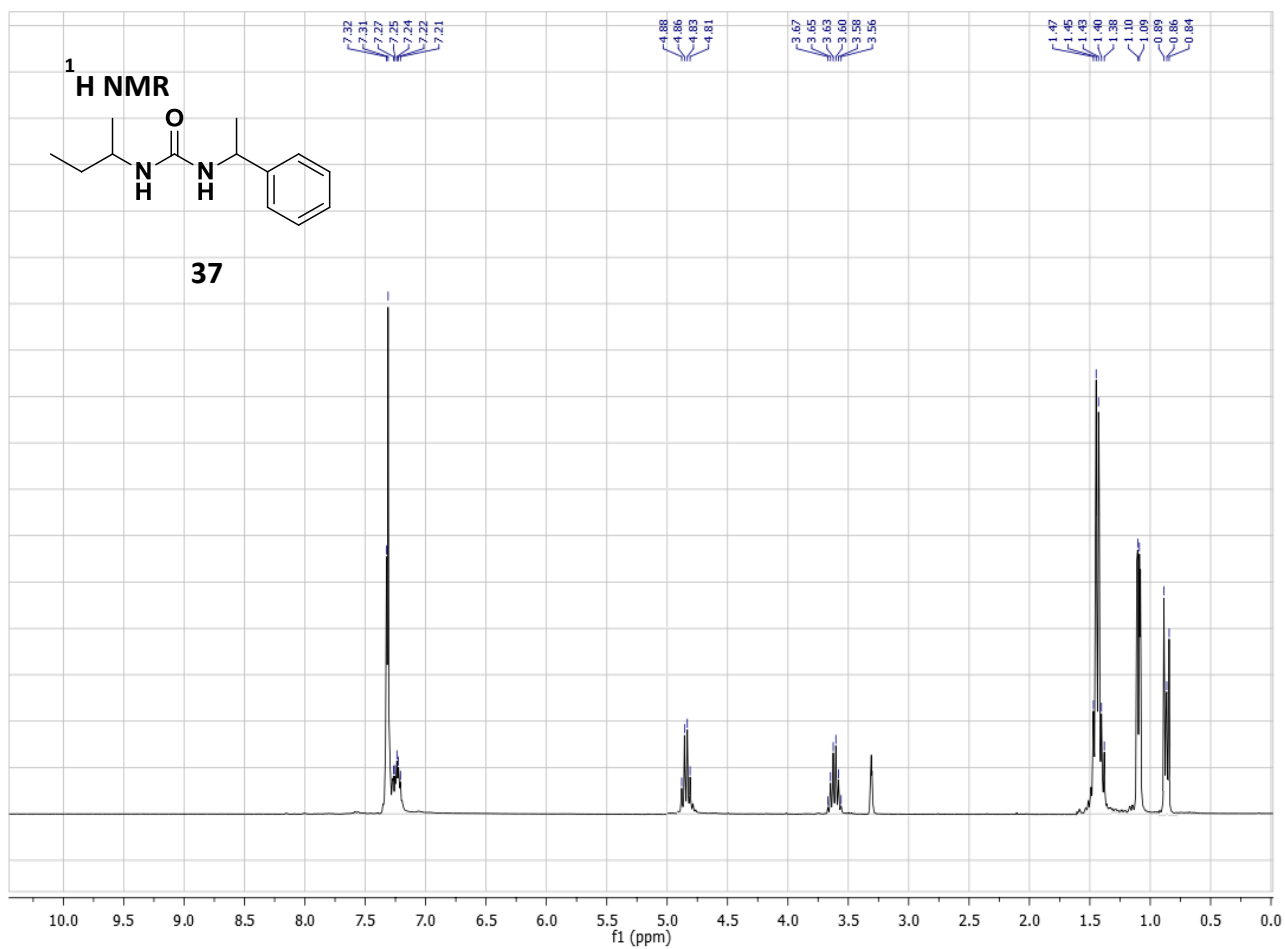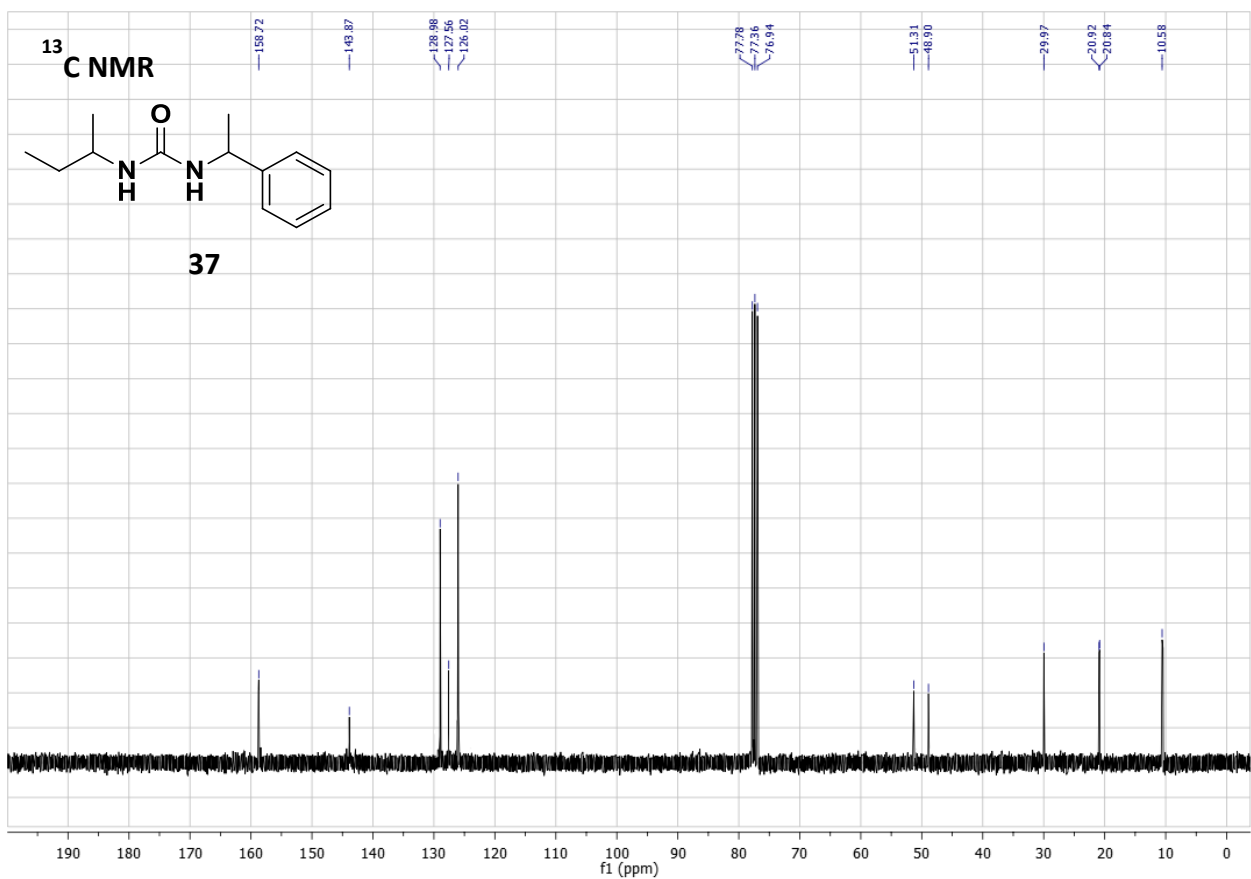

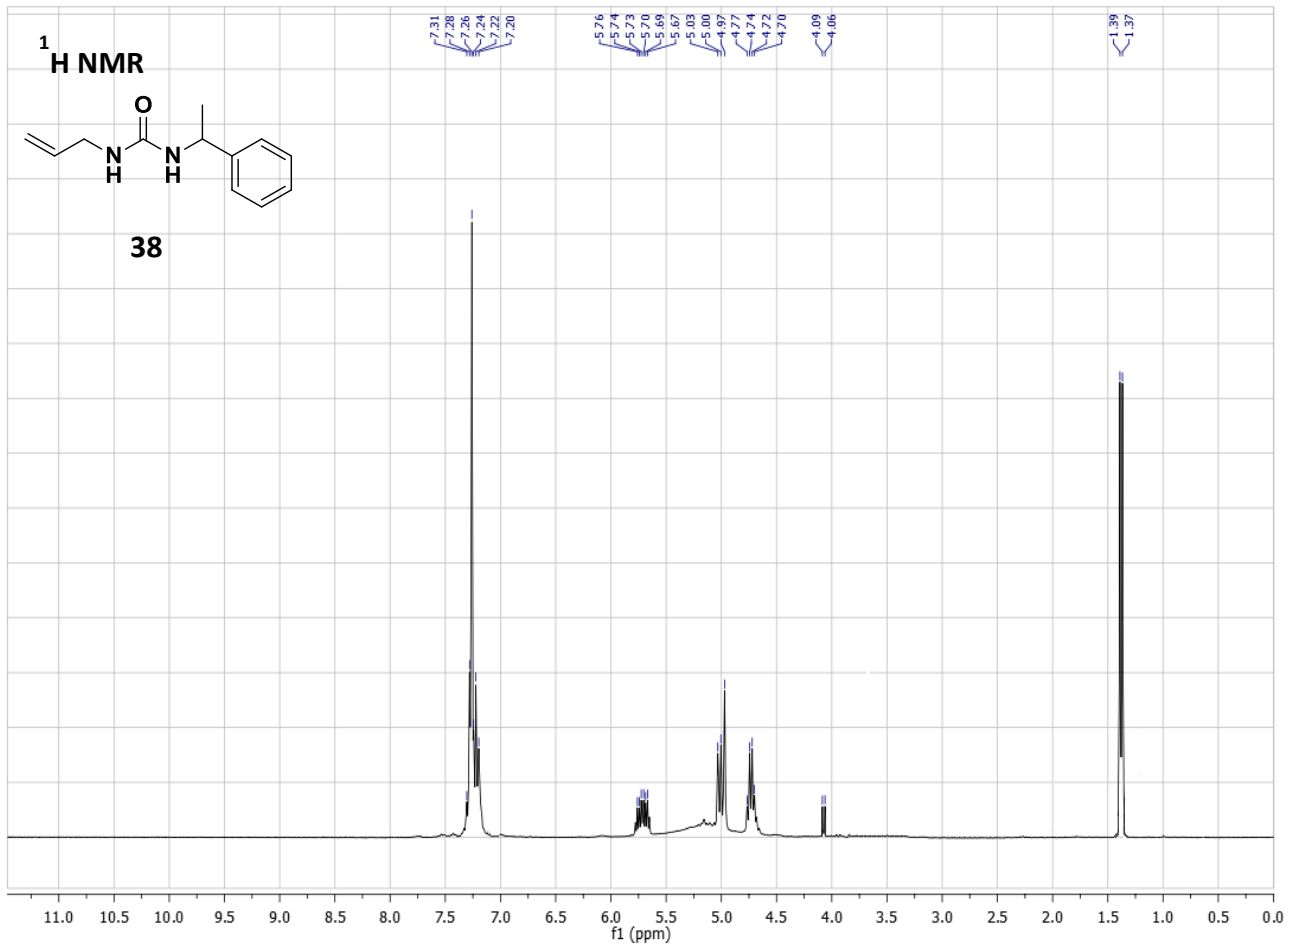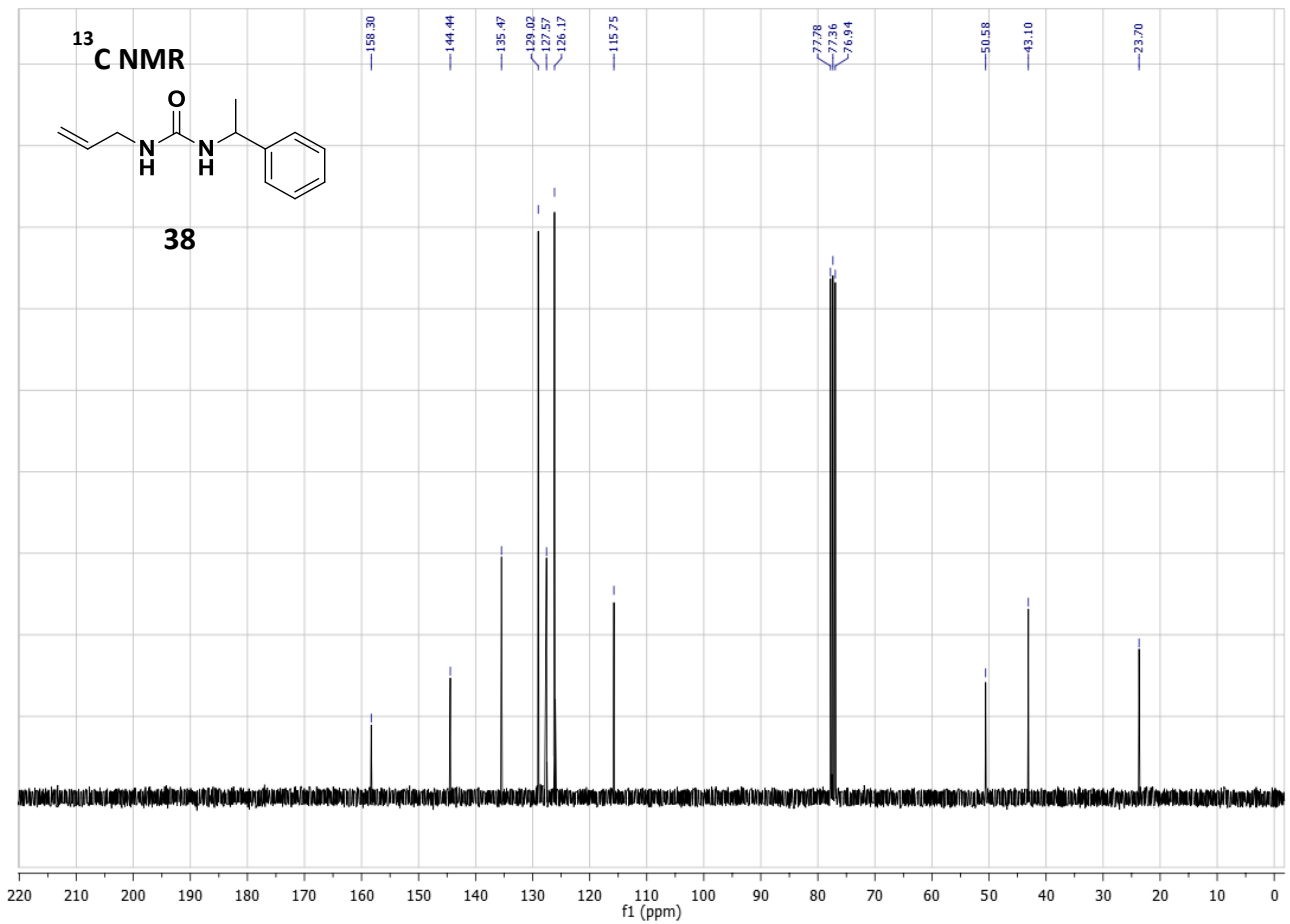

## References

1. Tsopmo, A.; Ngnokam, D.; Ngamga, D.; Ayafor, J. F.; Sterner, O. *J. Nat. Prod.* **1999**, *62*, 1435–1436.
2. Park, J. H.; Yoon, J. C.; Chunga, Y. K. *Adv. Synth. Catal.* **2009**, *351*, 1233–1237.
3. Dube, P.; Fine Nathel, N. F.; Vetelino, M.; Couturier, M.; Larrivee Aboussafy, C.; Pichette, S.; Jorgensen, M. L.; Hardink M. *Org. Lett.* **2009**, *11*, 5622–5625.
4. Peterson, S. L.; Stucka, S. M.; Dinsmore C. J. *Org. Lett.* **2010**, *12*, 1340–1343.
5. Perrone, M. G.; Bleve, L.; Santandrea, E.; Vitale, P.; Niso, M.; Scilimati, A. *ChemMedChem* **2009**, *4*, 2080–2097.
